# Mitochondrial DNA transmission, replication and inheritance: a journey from the gamete through the embryo and into offspring and embryonic stem cells

Justin C. St. John<sup>1,2,\*</sup>, Joao Facucho-Oliveira<sup>1,3</sup>, Yan Jiang<sup>1</sup>,  
Richard Kelly<sup>1,2</sup>, and Rana Salah<sup>1</sup>

<sup>1</sup>Mitochondrial and Reproductive Genetics Group, Clinical Sciences Research Institute, Warwick Medical School, CSB—University Hospital, Clifford Bridge Road, Coventry CV2 2DX, UK <sup>2</sup>Present address: Centre for Reproduction and Development, Monash Institute of Medical Research, 27–31 Wright Street, Clayton, Vic 3168, Australia <sup>3</sup>Present address: Institute for Biotechnology and Bioengineering (IBB), Centre for Molecular and Structural Biomedicine (CBME), Molecular Embryology Laboratory, Faculty for Science and Technology (FCT), University of Algarve (Ualg), 8000 Faro, Portugal

\*Correspondence address. E-mail: justin.stjohn@med.monash.edu

Submitted on September 30, 2009; resubmitted on December 21, 2009; accepted on January 19, 2010

---

## TABLE OF CONTENTS

---

- Introduction
  - Search methods
  - The mitochondrion
  - What is mtDNA?
  - mtDNA nucleoid
  - mtDNA replication
    - mtDNA replication in the pluripotent preimplantation embryo
    - mtDNA replication and embryonic differentiation
    - mtDNA replication, pre-gastrulation and undifferentiated ESCs
    - mtDNA replication and cellular differentiation
    - Modification of mtDNA replication
  - mtDNA transmission
    - Do the more sophisticated reproductive approaches affect mtDNA transmission?
    - What are the consequences of introducing somatic mitochondria and donor cell mtDNA into oocytes?
    - Is there an association between the genetic distance of donor cell mtDNA and recipient oocyte mtDNA?
    - What can be learnt from other cellular models?
    - Mitochondrial DNA replication and transmission following induced pluripotency
  - mtDNA segregation
    - Does heteroplasmy following reproductive technologies have implications for embryo, fetal and offspring survival and wellbeing?
  - Conclusions
-

**BACKGROUND:** Mitochondrial DNA (mtDNA) encodes key proteins associated with the process of oxidative phosphorylation. Defects to mtDNA cause severe disease phenotypes that can affect offspring survival. The aim of this review is to identify how mtDNA is replicated as it transits from the fertilized oocyte into the preimplantation embryo, the fetus and offspring. Approaches for deriving offspring and embryonic stem cells (ESCs) are analysed to determine their potential application for the prevention and treatment of mtDNA disease.

**METHODS:** The scientific literature was investigated to determine how mtDNA is transmitted, replicated and segregated during pluripotency, differentiation and development. It was also probed to understand how the mtDNA nucleoid is regulated in somatic cells.

**RESULTS:** mtDNA replication is strictly down-regulated from the fertilized oocyte through the preimplantation embryo. At the blastocyst stage, the onset of mtDNA replication is specific to the trophoctodermal cells. The inner cell mass cells restrict mtDNA replication until they receive the key signals to commit to specific cell types. However, it is necessary to determine whether somatic cells reprogrammed through somatic cell nuclear transfer, induced pluripotency or fusion to an ESC are able to regulate mtDNA replication so that they can be used for patient-specific cell therapies and to model disease.

**CONCLUSIONS:** Prevention of the transmission of mtDNA disease from one generation to the next is still restricted by our lack of understanding as to how to ensure that a donor karyoplast transferred to an enucleated oocyte is free of accompanying mutant mtDNA. Techniques still need to be developed if stem cells are to be used to treat mtDNA disease in those patients already suffering from the phenotype.

**Key words:** embryology / genetic disorders / mitochondria / nuclear transfer / stem cells

## Introduction

The mitochondrion exists within the cytoplasm of nearly all eukaryotic cells. Along with mediating processes such as steroidogenesis, apoptosis, homeostasis and cell division, mitochondria are also essential generators of ATP through the process of oxidative phosphorylation (OXPHOS) which takes place within the electron transfer chain (ETC). OXPHOS, unlike any other cellular process, is highly dependent on the expression of proteins encoded by the mitochondrial genome [mitochondrial DNA (mtDNA)] and chromosomally encoded genes. Although the transmission of mtDNA is dependent on the mitochondrion as its vehicle, both the mitochondrion and mtDNA should be considered as independent entities that co-exist, just as the mitochondrion co-exists within the cytoplasm of a cell but its origins are bacterial (Cavalier-Smith, 2009). The role played by the mitochondrial genome in reproductive biology has been largely ignored. However, since the advent of more sophisticated reproductive technologies, such as nuclear transfer, its importance is becoming increasingly recognized, especially as mixed and diverse populations of mtDNA co-existing together could severely affect cellular function and thus offspring survival and quality of life.

## Search methods

A computerized search was carried out using MedLine and Web of Knowledge for key areas associated with the mitochondrial genome, mtDNA replication, the factors controlling mtDNA replication, mtDNA transmission and mtDNA segregation. The search initially focused on somatic cell biology and then the relevance of those areas related to mtDNA disease. The search then concentrated on how those events were regulated following natural fertilization which included the generation of offspring and stem cells through intra- and interspecific crosses. We then investigated the transmission of donor cell mtDNA following nuclear transfer and also sperm mtDNA in diverse crosses. After including interspecies nuclear transfer, we then probed the literature to understand how various other technologies could affect the normal transmission of mtDNA in order that we could make predictions about transmission from those technologies that have yet to be

investigated. We restricted our search to mtDNA, but did discuss mitochondrial and ETC function when, specifically, the effects of heteroplasmy might affect cellular function and offspring survival. The literature was also interrogated for mtDNA-type disease and how this might be prevented through oocyte manipulation and stem cell therapy.

## The mitochondrion

Mitochondria exist in various topographical forms, which reflect the type and functions of the cells they serve and thrive off. In maturing oocytes and early cleavage stage embryos, they tend to be oval and spherical while in the differentiating and mature cells, they adopt a more elongated configuration (Sathananthan *et al.*, 2002). Furthermore, the density of mitochondria per cell is often indicative of the cell's requirements for ATP production (Moyes *et al.*, 1998). Consequently, cells such as neurons and muscles tend to have higher densities, though these are considerably fewer than the metaphase II stage oocyte, which possesses between 150 000 and 300 000 mitochondrial profiles (Jansen and De Boer, 1998).

## What is mtDNA?

In humans, the circular, double-stranded mtDNA genome is ~16.6 kb in size (Fig. 1) and resides within the inner membrane of the mitochondrion. It consists of a heavy (H) and a light (L) strand, which encode 13 of the polypeptides contributing to Complexes I, III, IV and V of the ETC (Fig. 2). The remaining genes and those of Complex II are derived from chromosomal DNA (Anderson *et al.*, 1981). Specifically, mtDNA codes seven subunits of NADH dehydrogenase (Complex I), one subunit of cytochrome *c* reductase (Complex III), three subunits of cytochrome *c* oxidase (Complex IV) and two subunits of the ATP synthase (Complex V; Fig. 1). mtDNA also encodes some of its own transcriptional and translational machinery, i.e. 22 tRNAs and 2 rRNAs, emphasizing the semi-autonomous nature of this genome as these processes are also dependent on chromosomally encoded genes. Furthermore, the chromosomally encoded transcription and replication factors interact with the only non-coding region of the

genome, the displacement loop (D-loop). Otherwise, the mtDNA genome contains no introns interspersed between the coding regions with some of the coding regions even overlapping each other, namely ATPase 6, ATPase 8, ND4 and ND4L (Anderson et al., 1981). Furthermore, some of the other genes do not possess

termination codons, as these are generated through post-transcriptional polyadenylation (Ojala et al., 1981).

## mtDNA nucleoid

mtDNA replication is mediated by several nuclear-encoded transcription and replication factors, which along with mtDNA are packed within a space of  $\sim 70$  nm in diameter, forming the mitochondrial nucleoid (Chen and Butow, 2005). There are  $\sim 30$  nucleoid proteins conserved between different species (Chen and Butow, 2005). Some of these are responsible for the maintenance and packaging of mtDNA, whereas the others have, in addition to their role in mtDNA maintenance, a metabolic function (Kucej and Butow, 2007). A structural model has been suggested where the nucleoid is composed of a central core and a peripheral region where the central core proteins are involved in nucleic acid synthesis (Fig. 3; Table I), whereas translation and protein assembly occur in the peripheral region (Bogenhagen et al., 2007). The number of mitochondrial nucleoids per mitochondrion ranges from 1 to 10 (Sato and Kuroiwa, 2004). There is a dispute about mtDNA copy number as the estimated copies/mitochondrion ranged from 1 to 15 (Sato and Kuroiwa, 2004), whereas others report that there are between 2 and 8 copies of mtDNA in each nucleoid (Legros et al., 2004).

Both mitochondrial transcription factor A (TFAM; Ekstrand et al., 2004) and ATAD3 (He et al., 2007) have been proposed to provide either the key-linking protein or the backbone to the nucleoid. ATAD3 (also known as TOB3) is an AAA domain protein, consisting of two subdomains, ATAD3f1 and ATAD3f2 (Wang and Bogenhagen 2006; He et al., 2007). Although it is tightly associated with the inner mitochondrial membrane, its relationship with mtDNA is controversial. One study suggested that ATAD3 is attached to mtDNA at the

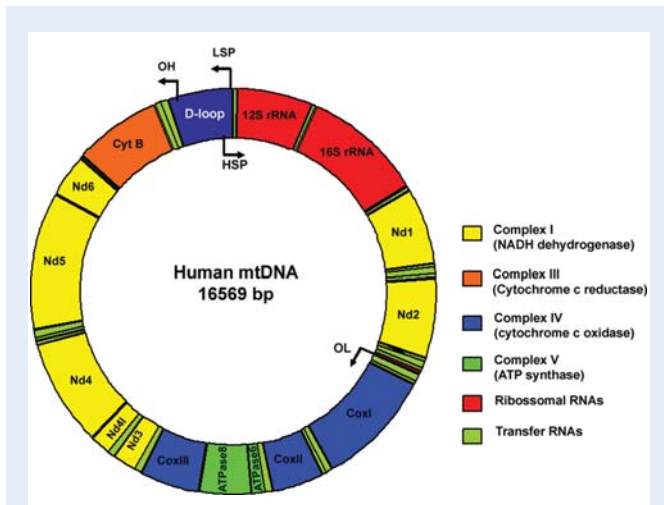

**Figure 1** The human mtDNA genome encodes 13 polypeptides of the ETC.

These include seven subunits of Complex I (ND 1–6 and ND4L), one subunit of Complex III (CytB), three subunits of Complex IV (COX I to III) and two subunits of Complex V (ATPase6 and ATPase8). It also encodes two rRNAs (12S and 16S) and 22 tRNAs (Anderson et al., 1981). The main control region is the D-loop which contains the H-strand promoter region (HSP), the LSP region and the origin of H-strand replication ( $O_H$ ). The second control region consists of only 30 bp and is located between ND2 and COXI and is the site of the origin of L-strand replication ( $O_L$ ).

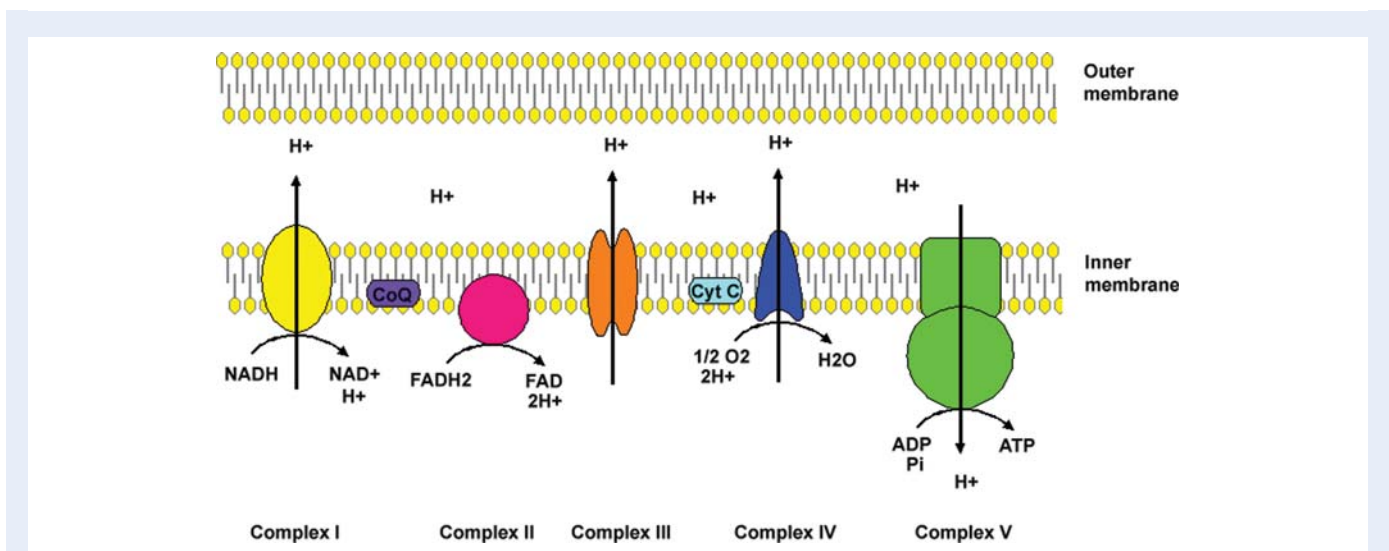

**Figure 2** The electron transfer chain (ETC) is the major generator of cellular ATP through OXPHOS.

The high energy electrons derived from NADH and  $FADH_2$  are transferred into Complexes I and II, respectively. The electrons then flow to the lipid-soluble carrier co-enzyme Q which in turn donates electrons to Complex III. Cytochrome c is the next electron acceptor and donates electrons to Complex IV. The energy released during the transfer of electrons is used by Complexes I, III and IV to pump protons across the mitochondrial inner membrane and to generate an electrochemical gradient. Complex V uses the mitochondrial membrane potential to produce ATP from adenosine diphosphate (ADP) and inorganic phosphate. Complex I (ND); Co-enzyme Q (CoQ); Complex II (SD); Complex III (cytochrome c reductase); Cytochrome c (CytC); Complex IV (COX); Complex V (ATPase).

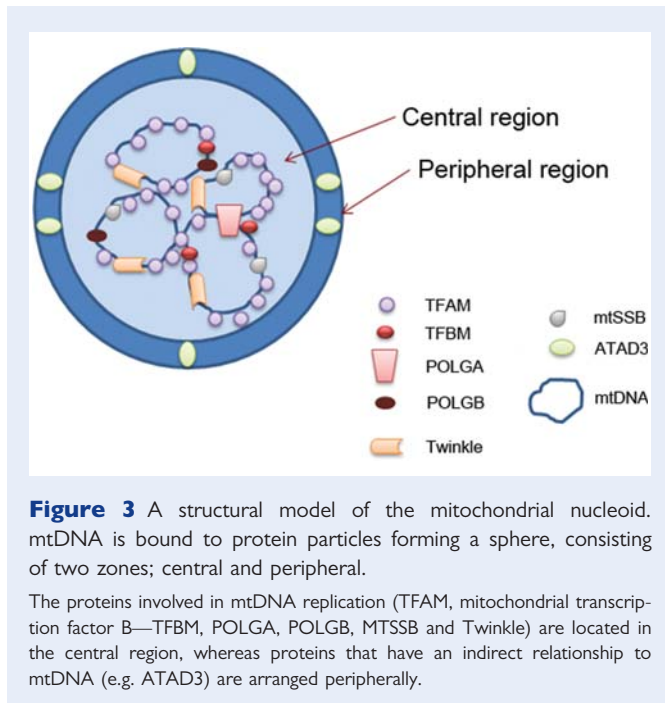

D-loop and it is involved in mitochondrial nucleoid formation and segregation (He *et al.*, 2007). However, immunofluorescence and protease susceptibility studies indicated that ATAD3 does not interact directly with mtDNA (Bogenhagen *et al.*, 2007). On the other hand, TFAM belongs to the high mobility group (HMG) box family of genes, which consists of a subset of genes characteristically associated with chromosomal DNA packaging, such as histones (Bianchi and Agresti, 2005). It has a molecular weight of ~25 kDa (Parisi and Clayton, 1991) and has three functions, namely binding, unwinding and bending of mtDNA.

The first function suggests a direct relationship between TFAM and mtDNA levels whereby over-expression of TFAM leads to an increase in mtDNA copy number (Ekstrand *et al.*, 2004; Hance *et al.*, 2005; Pohjoismaki *et al.*, 2006). Furthermore, the molar ratios of TFAM and mtDNA are ~900–1000:1 (Ekstrand *et al.*, 2004) again suggesting that mtDNA is extensively packaged with TFAM (Alam *et al.*, 2003). Indeed, the role of TFAM as an mtDNA-packaging molecule has been further supported by more recent studies demonstrating its co-localization to mtDNA through immuno-electron microscopy (Kaufman *et al.*, 2007). The latter two functions suggest an important role in mtDNA transcription further supporting its functional similarity to other HMG proteins (Fisher *et al.*, 1992; Takamatsu *et al.*, 2002; Bianchi and Agresti, 2005; Kaufman *et al.*, 2007). Furthermore, up-regulation of TFAM expression results in an increase in expression of the mitochondrial-specific polymerase gamma (Polg) (Ekstrand *et al.*, 2004; Hance *et al.*, 2005) implying a role in initiation of mtDNA replication.

POLG mediates the replication, recombination and repair of mtDNA (Grazieswicz *et al.*, 2005), thus demonstrating its essential role in mtDNA maintenance (Spelbrink *et al.*, 2000). Although it is capable of replicating mtDNA, it cannot replicate mammalian chromosomal DNA, perhaps resulting from its similarities to other members of the family A group of DNA polymerases. These include *Escherichia*

*coli* DNA polymerase I and the T7 DNA polymerase (Fridlender and Weissbach 1971; Fridlender *et al.*, 1972; Beese *et al.*, 1993a, b). It consists of two subunits in animal cells and one in yeast (Grazieswicz *et al.*, 2005): POLGA is the catalytic subunit that has 3' → 5' exonuclease activity and accounts for the high fidelity of this enzyme. POLGB is the accessory subunit that forms a heterotrimer in humans (in other mammalian species, it forms a heterodimer) at a ratio of 2:1 with POLGA (Carrodeguas *et al.*, 1999, 2001), thus stabilizing the enzyme to increase efficiency. In addition, a recent study has suggested that POLGB is the key factor that determines mtDNA copy number within the nucleoid as it is required for D-loop synthesis (Di Re *et al.*, 2009).

Two other factors play a key role in mtDNA replication. The helicase, Twinkle, was originally identified in association with autosomal dominant progressive ophthalmoplegia, a mitochondrial disorder characterized by mtDNA deletions (Spelbrink *et al.*, 2001). It shares a structural similarity to the C-terminal helicase part of bacteriophage T7 gene 4 protein which exhibits both helicase and primase activities (Bernstein and Richardson, 1989; Spelbrink *et al.*, 2001). Although mammalian Twinkle seems to lack primase activity (Spelbrink *et al.*, 2001), Twinkle homologues in *Plasmodium falciparum* (Seow *et al.*, 2005) and nearly all eukaryotes (Shutt and Gray, 2006) possess both helicase and primase activities. The mitochondrial single-stranded DNA-binding protein (mtSSB) mediates the unwinding of mtDNA through its physical interaction with Twinkle (Korhonen *et al.*, 2003), which co-localizes with both TFAM and mtSSB. These proteins act not only as structural components but also stabilize mtDNA during replication (Garrido *et al.*, 2002).

## mtDNA replication

Both the asymmetric and the coupled leading- and lagging-strand synthesis models have been described to explain mtDNA replication. The asymmetric model has been the traditional approach to understanding how mtDNA replication is mediated (reviewed in Shadel and Clayton, 1997). It is initiated from the origin of H-strand replication ( $O_H$ ), located within the D-Loop region, where TFAM binds to the enhancer of the light-strand promoter (LSP) and induces structural changes that expose the promoter region to the mitochondrial-specific RNA polymerase. This allows an RNA primer to be generated, which is used by POLGA to initiate mtDNA replication. mtDNA replication then continues two-thirds round the genome to the origin of L-strand replication ( $O_L$ ). L-strand synthesis then proceeds in the opposite direction.

The coupled leading- and lagging-strand synthesis model proposes that both H- and L-strands are replicated bidirectionally from the same initiation cluster site (Yasukawa *et al.*, 2005). This mechanism is thought to occur in addition to the asymmetric model, but is also typical of cells repopulating mtDNA. The coupled leading- and lagging-strand synthesis model has now been refined to include the presence of replication intermediates which allow gaps within the replicating mtDNA on the lagging-strand to be filled to complete the replicon (Yasukawa *et al.*, 2006). It has more recently been proposed that replication is driven from several origins of replication within the vicinity of the  $O_H$ . However, to date, there has been little resolution as to which model is the most appropriate with entrenched views being expressed by the two opposing groups (Bogenhagen and Clayton, 2003; Holt and Jacobs, 2003).

**Table 1** The key mtDNA nucleoid proteins associated with transcription and replication.

| Nucleoid protein | Molecular weight (kDa) | Chromosomal location (in human) | Function                                                                 | References                                                                 |
|------------------|------------------------|---------------------------------|--------------------------------------------------------------------------|----------------------------------------------------------------------------|
| TFAM             | 24.4                   | 10q21                           | Transcription and packaging                                              | Parisi and Clayton (1991)                                                  |
| POLGA            | 125–140                | 15q25                           | mtDNA maintenance                                                        | Ye et al. (1996); Lecrenier et al. (1997); Wernette and Kaguni (1986)      |
| POLGB            | 35–55                  | 17q                             | mtDNA maintenance, putative role as a regulator of mtDNA copy number     | Carrodeguas et al. (2001); Di Re et al. (2009); Wernette and Kaguni (1986) |
| Twinkle          | 77                     | 10q24                           | mtDNA unwinding                                                          | Li et al. (1999)                                                           |
| mtSSB            | 17.26                  | 7q34                            | Stabilizes D-loop and stimulates Twinkle activity                        | Takamatsu et al. (2002); Tomaska et al. (2001)                             |
| ATAD3 f1         | 59                     | 1p36.33                         | Chaperone-like activity; backbone to the nucleoid                        | Bogenhagen and Clayton (2003); He et al. (2007)                            |
| ATAD3 f2         | 56.4                   | 1p36.33                         | Chaperone-like activity; backbone to the nucleoid                        | Bogenhagen and Clayton (2003); He et al. (2007)                            |
| TFB1M            | 39.5                   | 16q25.1–q25.3                   | Accessory transcription factor and translation of mitochondrial proteins | Falkenberg et al. (2002)                                                   |
| TFB2M            | 45.3                   | 1q44                            | Accessory transcription factor and translation of mitochondrial proteins | Falkenberg et al. (2002)                                                   |
| mTERF            | 45.7                   | 7q21–q22                        | Control rRNA and mRNA synthesis                                          | Roberti et al. (2006)                                                      |
| mtRNA pol        | 138.6                  | 19p13.3                         | Initiation of transcription at a specific mtDNA site                     | Gaspari et al. (2004)                                                      |

It has been generally accepted that the mtDNA genome is not under direct epigenetic regulation. For example, mammalian cells characterized for mtDNA methylation are highly hypomethylated (Pollack et al., 1984). However, an important question that remains to be determined is how the expression of the key genes associated with mtDNA replication is mediated. Recent analysis of the promoter region of *Tfam* produced inconclusive data as to whether its expression was regulated by DNA methylation (Choi et al., 2004; Gemma et al., 2009). Nevertheless, more recent analysis of *PolgA* has however suggested that specific CpG islands within exon 2 of this gene are targeted (Oakes et al., 2007) and could thus account for changes in *PolgA* expression during spermatogenesis. This approach would certainly compliment the observation of an 8- to 10-fold decrease in the number of mtDNA molecules as these cells differentiate (Hecht et al., 1984). At this stage, *Tfam* expression is also decreased in the human (Larsson et al., 1997) and, in the mouse, an isoform is expressed that does not possess a mitochondrial targeting sequence (Larsson et al., 1996). This reduction in *Tfam* expression and mtDNA copy number would match other reports that indicate an association between *Tfam* and mtDNA copy number (Ekstrand et al., 2004), most likely restricting it to a packaging role in this instance. This suggests that replication could then be regulated by either a conformational or a numerical change to TFAM that would result in exposure of O<sub>H</sub> or the broader initiation cluster coupled with a change in the DNA methylation status of *PolgA*. Indeed, DNA methylation of *PolgA* would present a truly interesting scenario, namely that the replication of a bacterial-originating genome was mediated by epigenetic regulation of a mammalian nuclear-encoded gene(s). It would also therefore be worth considering other members of the mtDNA nucleoid to determine whether their expression is also mediated in a similar manner, or by other processes such as microRNAs.

### mtDNA replication in the pluripotent preimplantation embryo

Pluripotent blastomeres of mammalian preimplantation embryos and embryonic stem cells (ESCs) share a number of mitochondrial characteristics such as limited oxidative capacity and a greater dependence on anaerobic respiration (reviewed in Facucho-Oliveira and St John, 2009). This is further highlighted, following fertilization of the oocyte, by either whole embryo mtDNA copy number remaining constant during mouse preimplantation development up to the morula stage (Thundathil et al., 2005) or the reduction observed in porcine (Spikings et al., 2007) and bovine embryos (May-Panloup et al., 2005). Nevertheless, during the early cleavage stages, mammalian embryos express either very low levels of mtDNA replication factors or there is no expression (May-Panloup et al., 2005; Thundathil et al., 2005; Spikings et al., 2007). Consequently, mtDNA replication does not take place up to and including the morula stage and the number of mtDNA copies/blastomere is progressively decreased after each embryonic cell division. This results in these blastomeres progressively losing their capacity to generate ATP through OXPHOS as they become more reliant on anaerobic respiration (Leese and Barton, 1984; Leese 1995; Van Blerkom et al., 2002). Indeed, mouse (Batten et al., 1987), cattle (Stojkovic et al., 2001), pig (Spikings et al., 2007), monkey (Squirell et al., 2003) and human preimplantation embryos (Wilding et al., 2001) contain low numbers of spherical and immature mitochondria which are located in the perinuclear regions of the cytoplasm. The loss in mtDNA copy number is mirrored by mtDNA replication factor activity. For example, in pig and sheep, POLGA, POLGB and TFAM are only briefly detected between the 4- to 8-cell (Spikings et al., 2007) and 8-cell to 16-cell stages (Bowles et al., 2007b), respectively, whereas in cattle, *Tfam* is first up-regulated at the morula stage

(May-Panloup *et al.*, 2005). These brief mtDNA replication events are most likely associated with the generic turnover of a multiple sets of genes, i.e. during embryonic genome activation (EGA; Ma *et al.*, 2001), as demonstrated by the small mtDNA replication event, determined by 5-bromo-2'-deoxy-uridine staining, which takes place in pre-nuclear and 2-cell stage mouse embryos (McConnell and Petrie, 2004).

### mtDNA replication and embryonic differentiation

At the blastocyst stage, there is an up-regulation in the expression of mtDNA replication factors which leads to reactivation of mtDNA replication in those mammalian species so far investigated (Piko and Taylor, 1987; May-Panloup *et al.*, 2005; Thundathil *et al.*, 2005; Spikings *et al.*, 2007). At the same time, mitochondria start to differentiate into elongated organelles containing swollen cristae (Stern *et al.*, 1971; Piko and Matsumoto, 1976; Wilding *et al.*, 2001), acquire a higher membrane potential and levels of oxygen consumption, and increased OXPHOS activity leading to ATP production (Trimarchi *et al.*, 2000; Wilding *et al.*, 2001; Houghton, 2006). However, these replication events are most likely specific to the trophoblast cells, the cells that give rise to the placenta and will mediate the process of implantation if the embryo is to continue to develop. These cells are no longer pluripotent, i.e. have the potential to differentiate in to any cell type of the body, and typically express markers such as *Cdx2* (Niwa *et al.*, 2005). The inner cell mass (ICM) cells, which are pluripotent and give rise to the fetus and ESCs, continue to express high levels of the pluripotency genes such as *Oct4*, *Nanog* and *Sox-2* (Chen and Daley, 2008). They also continue to express low levels of POLG and TFAM (Spikings *et al.*, 2007). As such, the high levels of expression of pluripotency genes appear to be associated with low levels of expression of mtDNA replication factors and anaerobic metabolism (reviewed in Facucho-Oliveira and St John, 2009).

### mtDNA replication, pre-gastrulation and undifferentiated ESCs

The ICM cells continue to divide before they undergo gastrulation or give rise to ESCs and thus progressively gain an increased nucleocytoplasmic ratio. At the blastocyst stage, there are ~483 000 copies of mtDNA per single cell in the ICM (Cao *et al.*, 2007). Consistent with the undeveloped mitochondrial network in the pluripotent ICM, undifferentiated pluripotent mouse and human ESCs contain ~20 mitochondria profiles with poorly developed cristae (Rivolta and Holley, 2002; Baharvand and Matthaei, 2003; St John *et al.*, 2005a, b; Cho *et al.*, 2006; Chung *et al.*, 2007), and high levels of glycolytic enzymes (Kondoh *et al.*, 2007). As the ICM cells progress to become ESCs, they also express low levels of mitochondrial replication factors, such as *PolgA*, *PolgB* and *Tfam* (St John *et al.*, 2005a, b; Facucho-Oliveira *et al.*, 2007) and progressively reduce their mtDNA copy number so that they possess 30–45 copies/cell (Facucho-Oliveira *et al.*, 2007; Spikings 2007). Similarly, undifferentiated hESCs also contain very low levels of mRNA for *Tfam*, *Tfb1m*, *Tfb2m* and *PolgA* (St John *et al.*, 2005a, b). Consequently, any mtDNA replication observed in the ongoing pluripotent cell will most likely be associated with replenishment rather than active increases in mtDNA copy number which will occur prior to division to ensure that each newly divided mitochondrion has sufficient copies of mtDNA for transcription and transmission.

### mtDNA replication and cellular differentiation

The onset of mtDNA replication and cellular differentiation can be studied in ESCs and parallels studies in the mouse embryo. Indeed, the analyses of the expression of a panel of lineage-specific markers showed a strong correlation between days of spontaneous differentiation of mESCs and stages of mouse embryo development (Leahy *et al.*, 1999). To this extent, it has been demonstrated that embryoid bodies (EBs) at Days 1 and 2 are equivalent to mouse embryos at E4.5 to E6.5; EBs at Days 3–5 are equivalent to E6.5 to E7.0 and that EBs after Day 6 are equivalent to E 7.5. Moreover, the embryos at E4.5 and E6.5 are at pre-gastrulation which correlates with the up-regulation of pluripotency genes in Days 1 and 2; R1 mESCs (Facucho-Oliveira *et al.*, 2007). At E6.5 to E7.0, embryos are in gastrulation as determined by detection of markers associated with the endoderm, mesoderm and ectoderm (Leahy *et al.*, 1999), and therefore, down-regulation of the pluripotency genes and up-regulation of lineage-specific markers would be expected (Days 3–4). At E7.5, mouse embryos are in the early stages of organogenesis (Leahy *et al.*, 1999). During Days 1 and 2 of spontaneous differentiation of ESCs, the expression of the pluripotent markers *Nanog*, *Dppa5*, *Pramel7* and *Ndp5211* were up-regulated (Facucho-Oliveira *et al.*, 2007; Facucho-Oliveira and St John, 2009). These pluripotency genes were then down-regulated and the percentage of Vimentin<sup>+</sup>, Nestin<sup>+</sup> and  $\beta$ -tubulin III<sup>+</sup> cells increased during Days 3 and 4. At this stage, the expression of *PolgA*, *PolgB* and *Tfam* and the number of mtDNA copies/cell were minimal. By Day 6, the expression of *PolgA*, *PolgB* (Facucho-Oliveira *et al.*, 2007; Fig. 4), and the nuclear-encoded ATPase5b and the mtDNA-encoded COXI (Fig. 5) were up-regulated in line with an increase in the number of mitochondria and mtDNA copies/cell (Facucho-Oliveira *et al.*, 2007). This indicates that the onset of organogenesis requires an increase in expression of the mtDNA replication factors and ETC subunits. This is further supported by homozygous *PolgA* knockout mice dying between days E7.5 and E8.5 (Hance *et al.*, 2005) and homozygous *Tfam* knockout mice between E8.5 and E10.5 (Larsson *et al.*, 1998).

### Modification of mtDNA replication

Stem cells have the ability to respond to the environment in which they exist. For example, the stroma has been proposed as a mediator of stem cell maintenance and thus the regulator of the stem cell niche and can mediate differentiation (e.g. see McKinney-Freeman and Daley, 2007). Equally, ESCs can undergo targeted differentiation into specific lineages to generate enriched populations of single cell types. This can be mediated through addition of chemical reagents such as retinoic acid (RA; Dani *et al.*, 1997; Rohwedel *et al.*, 1999) or growth factors (Reubinoff *et al.*, 2001) to the culture media, through genetic engineering (Xiong *et al.*, 2005) or epigenetic modification to key developmental transcriptional factors (Kawamura *et al.*, 2005). For example, the treatment of mESCs with RA has been shown to enhance neuronal differentiation (Bain *et al.*, 1995; Fraichard *et al.*, 1995; Strübing *et al.*, 1995; Rohwedel *et al.*, 1999) and can also induce amplified transcription of the mtDNA-encoded NADH dehydrogenase subunit 5, COXI and 16S rRNA (Li *et al.*, 1994; Gaemers *et al.*, 1998) genes. However, induction of differentiation with RA not only increased the number of neuronal-type cells expressing Nestin and

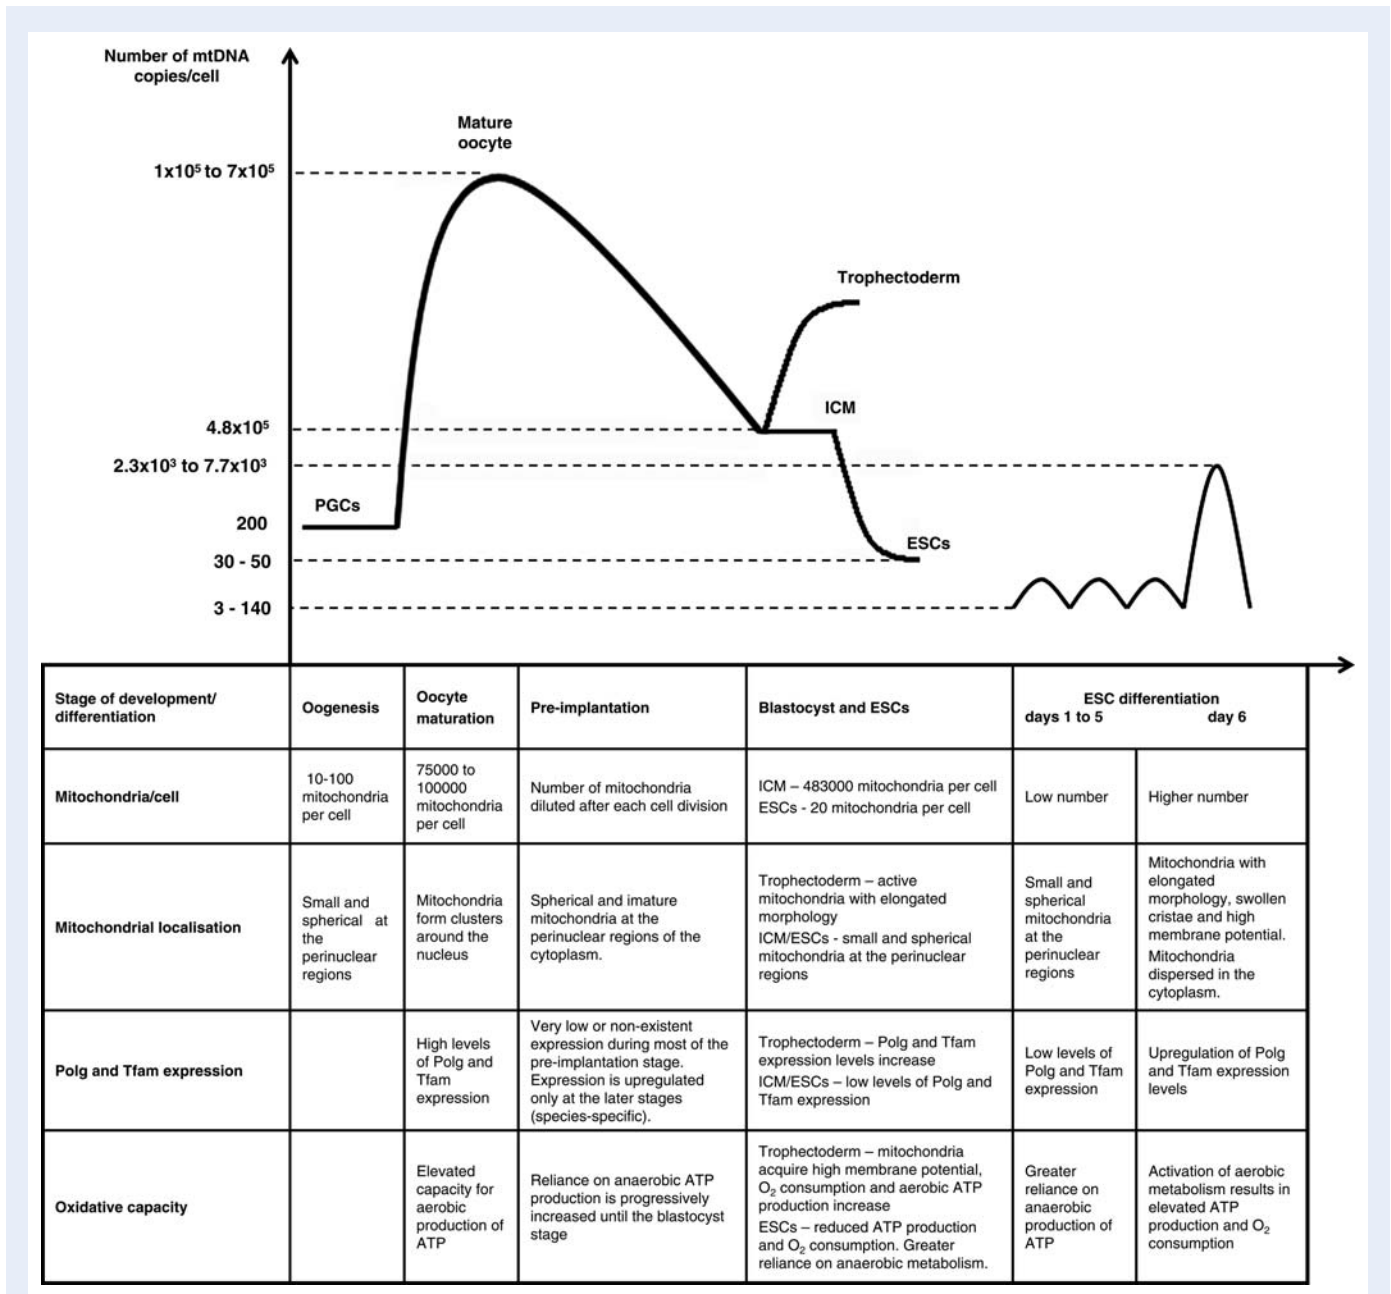

**Figure 4** The main events of mitochondrial biogenesis and mtDNA proliferation.

Both mitochondrial biogenesis and mtDNA replication are tightly regulated processes that ensure sufficient numbers of mitochondria and copies of mtDNA are available for the onset of OXPHOS as the oocyte is fertilized. mtDNA replication is then significantly reduced during preimplantation development with only increases taking place in the trophoblast to aid implantation. However, the cells of the ICM continue to decrease their numbers with each cell division with undifferentiated and differentiating ESCs maintaining low copy number.

β-tubulin, when compared with spontaneous differentiating cells, but it also produced significantly different patterns of mtDNA replication (Facucho-Oliveira *et al.*, 2007) and was marked by a significant increase in expression of *Tfam*, *PolgA* and *PolgB*.

During Days 1–5, the RA-induced D3 mESCs had higher levels of *PolgA*, *PolgB* and *Tfam* expression, a higher number of mtDNA copies/cell (Facucho-Oliveira *et al.*, 2007; Fig. 4) and higher percentage of cells with increased ATPase5b and COX1 expression (Fig. 5) than the D3 mESCs differentiated in the presence of 25 mM glucose

(standard glucose concentration for ESC culture). RA exposure also enhanced neuronal differentiation in comparison to the D3 mESCs differentiated in 25 mM glucose. RA-induced D3 mESCs had higher percentages of Vimentin<sup>+</sup> and β-tubulin III<sup>+</sup> cells on Day 1, a lower percentage of Vimentin<sup>+</sup> cells during Days 2–7 (Facucho-Oliveira *et al.*, 2007; Fig. 4) and a higher percentage of β-tubulin III<sup>+</sup> cells on Day 14 (Fig. 5).

The presence of glucose also influences metabolic activity. This is demonstrated by D3 mESCs differentiated in the presence of 1 and

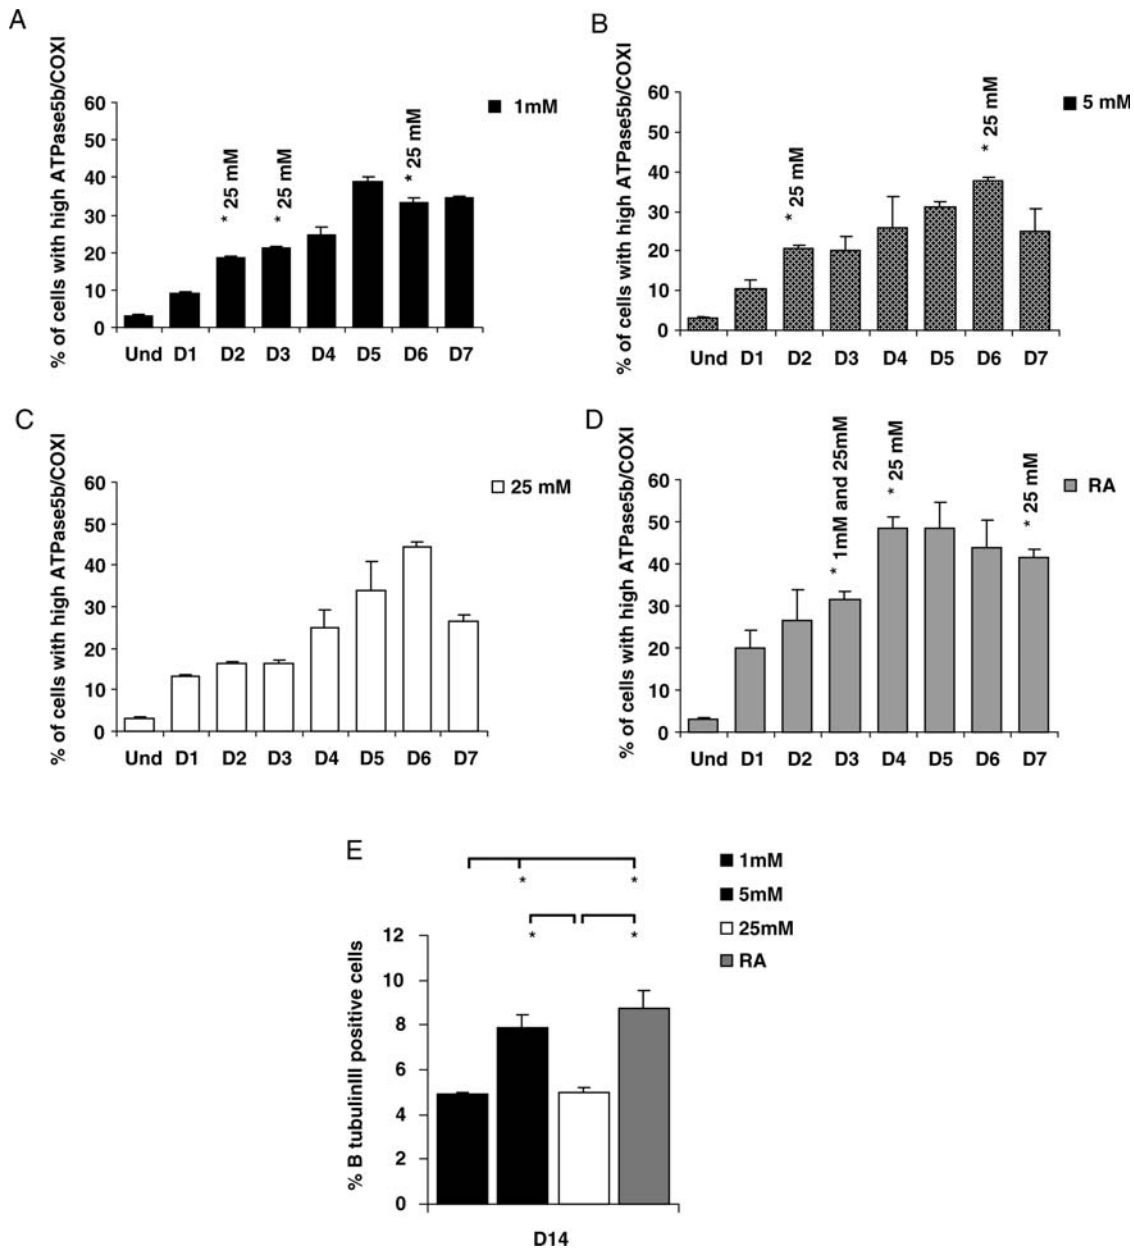

**Figure 5** Percentage of cells with increased ATPase5b and COXI expression during differentiation of D3 mESCs in the presence of 1 mM (A), 5 mM (B) and 25 mM (C) of glucose and RA-induced differentiation (D). D3 mESCs differentiated in the presence of 1 and 5 mM of glucose had a higher percentage of cells with increased ATPase5b and COXI expression than D3s differentiated in the presence of 25 mM of glucose on Days 2 and 3 (A–C). However, the D3s differentiated in the presence of 25 mM of glucose had a higher percentage of cells with elevated levels of ATPase5b and COXI than the D3 differentiated in 1 and 5 mM of glucose on Day 6 (A–C). The RA-induced D3 mESCs had the highest percentage of cells with increased ATPase5b and COXI expression on Days 1–5 and 7 (D). The percentage of  $\beta$ -tubulin III<sup>+</sup> neurons was significantly higher in the RA-induced D3s and D3s differentiated in the presence of 5 mM of glucose than in the D3s differentiated in the presence of 1 and 25 mM of glucose on Day 14 (E). Bars represent mean  $\pm$  s.e.m.; significant differences in the percentage of cells with increased ATPase5b and COXI expression are indicated (\* $P < 0.05$ ).

5 mM glucose having a higher percentage of cells with increased ATPase5b and COXI expression than the D3 mESCs differentiated in the presence of 25 mM glucose on Days 2 and 3 (Fig. 5). Furthermore, the D3 mESCs differentiated in 5 mM glucose showed a higher percentage of  $\beta$ -tubulin III<sup>+</sup> cells than the D3 mESCs differentiated in 25 mM glucose on Day 14 (Fig. 5).

## mtDNA transmission

Mammals normally inherit their mtDNA from the population present in the oocyte just prior to fertilization (reviewed in Birky, 1995, 2001) when mtDNA replication has been completed (Spikings *et al.*, 2007). These copies tend to be identical and thus the mtDNA transmitted to



the offspring is homoplasmic (Giles *et al.*, 1980). Following natural fertilization, sperm mtDNA tends to be eliminated thus ensuring the maintenance of homoplasmy, though this is primarily restricted to intra-specific crosses. This arises as, during early spermatogenesis, spermatogonia are labelled with ubiquitin, which appears to be 'masked' as spermatozoa transit through the epididymis and is then present following ejaculation (reviewed in Sutovsky *et al.*, 2004). Having entered the oocyte, sperm mitochondria, and thus its mtDNA complement, are eliminated prior to embryonic gene activation (EGA) for that particular species. For example, in the mouse, sperm mitochondria and mtDNA persist to the 2-cell stage (Kameda *et al.*, 1995; Shitara *et al.*, 2000), whereas in larger mammals, such as sheep (Zhao *et al.*, 2004) and cattle (Sutovsky *et al.*, 1999), it is eliminated by the 8-cell stage, and in the rhesus macaque (St John and Schatten, 2004; Sutovsky *et al.*, 1999) and humans (St John *et al.*, 2000), this tends to be at the 4–8-cell stage (St John *et al.*, 2000). This suggests that the process of ubiquitination is unlikely to be associated with new genes transcribed during the initial round of transcription following EGA, but is dependent on mRNA carried over from the oocyte and subsequently translated.

Following interspecific crossing, e.g. the mating of two different strains of mouse (Gyllensten *et al.*, 1991; Shitara *et al.*, 2000) or different breeds of sheep (Zhao *et al.*, 2004) or subspecies of rhesus macaques (St John and Schatten, 2004), sperm mtDNA can be transmitted through the offspring. Although only low levels of sperm mtDNA tend to be transmitted, there is no evidence to suggest that this is transmitted to subsequent generations (Gyllensten *et al.*, 1991). Consequently, the molecules recognized by the ubiquitination process are likely to be species-specific. However, the mechanism that precludes sperm mtDNA from being transmitted within a species, such as in the human, is not absolute. Indeed, there is one reported case of sperm mtDNA recombining with oocyte mtDNA creating a new hybrid molecule that segregated to one but not other tissues giving rise to a muscle myopathy in a male patient (Schwartz and Vissing, 2002; Kraysberg *et al.*, 2004). Furthermore, abnormal human embryos can also fail to eliminate their sperm mtDNA (St John *et al.*, 2000). These outcomes assert the argument that transmission is dependent on mtDNA replication, where sperm will contribute copies to the fertilization process, and if not eliminated, will be available for both replication and transmission. Interestingly, though poor-quality sperm have significantly higher numbers of mtDNA (Diez-Sanchez *et al.*, 2003; May-Panloup *et al.*, 2003; Amaral *et al.*, 2007). However, although poorer quality sperm are then used in ICSI treatment, to date there have been no reported cases of transmission resulting from this treatment (Danan *et al.*, 1999; Marchington *et al.*, 2002).

Transmission of sperm mtDNA is evident in both invertebrates and vertebrates. For example, blue mussels transmit both maternal- and paternal-type genomes to male offspring and maternal only genomes to female offspring (Zouros *et al.*, 1992) suggesting an important outcome for mtDNA transmission in sex selection and sex determination, although this is now contested (Kenchington *et al.*, 2009). Both intra- and interspecific crosses of *Drosophila* can transmit both oocyte- and sperm-derived mtDNA to their offspring (Kondo *et al.*, 1992). However, there is no reported evidence from such models to suggest that the transmission of potentially diverse mtDNA molecules would give rise to any type of mitochondrial-related disease

or whether the resultant offspring exhibit specific advantageous or disadvantageous traits. Although increased genetic distance between the sperm and the oocyte is likely to influence fertilization outcome, the transmission of sperm mtDNA is normally at significantly low levels that it is unlikely to induce a phenotypic disadvantage, except in rare cases. Consequently, the potential for sperm mtDNA to be transmitted is most likely restricted to those crosses where the degree of genetic distance does not prevent mtDNA from restricting fertilization outcome. However, there is likely to be merit in conducting a wide-ranging inclusive study of sperm mtDNA transmission in humans. Although a few studies have indicated that sperm mtDNA is not transmitted (Taylor *et al.*, 2003), they tend to have been centred on samples from patients with mtDNA disease. They would not necessarily provide an insight into the overall levels of sperm mtDNA leakage within a population; this necessitates a large, wide-ranging study.

There are a large number of mtDNA mutations and deletions, which have been associated with a large number of clinical phenotypes (see Wallace, 1999, for review). For example, Leber's hereditary optic neuropathy (LHON; Wallace *et al.*, 1988; Howell *et al.*, 1991) and neurogenic weakness, ataxia and retinitis pigmentosa (Fryer *et al.*, 1994) are associated with single point mutations in coding genes, whereas mitochondrial myopathy, encephalopathy, lactic acidosis and stroke-like episodes (MELAS; Goto *et al.*, 1990) and deafness (Van den Ouweland *et al.*, 1992) result from single point mutations to tRNAs and rRNAs. mtDNA disease is also associated with large-scale deletions, e.g. the 4977-bp deletion resulting in Kearns–Sayre syndrome (KSS; Schon *et al.*, 1989). The onset of the phenotype for each of these diseases will be determined by the degree of mutant to wild-type molecule that persists within the affected tissue. In the case of LHON, it is predicted that over 60% mutant molecule needs to be present for the phenotypic onset of the disease to be clinically recognized (Chinnery *et al.*, 2001), whereas for MERRF, over 85% mutant needs to be present (Boulet *et al.*, 1992). However, this general rule has now been contradicted by recent findings associated with severe multisystem disorder and respiratory chain deficiency where the mutation was present at less than 25% (Sacconi *et al.*, 2008).

### Do the more sophisticated reproductive approaches affect mtDNA transmission?

The introduction of more sophisticated techniques for generating embryos, ESCs and offspring, such as cytoplasmic transfer and nuclear transfer (NT) have led to a re-fashioning of the concept of heteroplasmy. Cytoplasmic transfer, the transfer of cytoplasm from a donor oocyte, was introduced into human-assisted reproduction treatment to increase embryonic developmental outcome for those women who had suffered from repeated embryonic developmental failure, most often at the post-8-cell stage (Cohen *et al.*, 1997). Here, donor oocyte cytoplasm was supplemented into such oocytes. As the oocyte cytoplasm contains not only mRNAs but also mitochondria, it was evident that two populations of mtDNA, one from the recipient oocyte and one from the donor cytoplasm, were transferred with the sperm to aid the fertilization process. Consequently, some of the resultant offspring were heteroplasmic (Brenner *et al.*, 2000). Similar outcomes have been observed following

the transfer of either mouse mitochondria into mouse oocytes (Laipis, 1996) or embryos (Nakada *et al.*, 2001) or a germinal vesicle stage or pronuclear karyoplast (Jenuith *et al.*, 1996; Meirelles and Smith, 1997, 1998; Palermo *et al.*, 2002; He *et al.*, 2003; Sato *et al.*, 2005) into a mouse oocyte. As with human cytoplasmic transfer, it was evident that variable amounts of mtDNA from either the supplementing source or the karyoplast could be identified in the resultant offspring. In three independent experiments, this has been shown to range from 5% to 80% (Laipis, 1996), 0% to 30% (Jenuith *et al.*, 1996) and 16% to 69% (Meirelles and Smith, 1997). Interestingly though, karyoplast transfer is only successful when the karyoplast is introduced into a cytoplasm from the same stage of development (Liu *et al.*, 2003).

Although cytoplasmic transfer can result in live offspring, a longitudinal study of heteroplasmic mice has demonstrated a range of physiological abnormalities when compared with control animals (Acton *et al.*, 2007). These included systemic and pulmonary hypertension, increased body mass and fat mass and abnormalities associated with electrolytes and haematological parameters. These abnormalities most likely arise from the genetic distance between the two populations of mtDNA where the genetic variability which will result in differing amino acids being encoded and could thus mimic mtDNA-type disease. This has perhaps been further exemplified through the generation of mice harbouring a large-scale deletion that induced multiple phenotypes when >85% of the deleted molecule was present (Nakada *et al.*, 2001). Although there is no direct association with human mtDNA-type disease, cytoplasmic transfer has resulted in two cases of Turner's syndrome leading to one selective and one spontaneous miscarriage, and one case of pervasive development disorder (Barritt *et al.*, 2001). Nevertheless, a recent study has demonstrated that isolated populations of mitochondria can be transferred from developmentally competent oocytes into their incompetent counterparts resulting in increased fertilization and developmental outcome. This suggests that (i) mitochondria do play a key role in early development (El Shourbagy *et al.*, 2006) and (ii) improved fertilization outcome could be achieved with mtDNA derived from the same genetic source. This could have implications for human-assisted reproductive treatment, where, for a cohort of oocytes obtained from an individual following hormonal stimulation, mitochondria could be collected from several of her oocytes and pooled. These mitochondria could then be introduced into the remaining oocytes to increase fertilization and development outcomes.

Studies involving either embryonic cell NT (ECNT) and somatic cell NT (SCNT) have demonstrated that the mtDNA accompanying the donor cell can be transmitted to the offspring at varying levels along with recipient oocyte mtDNA. This occurs as the process of NT often uses a whole donor cell (Campbell *et al.*, 1996), with donor cell mtDNA being either eliminated during preimplantation development, resulting in homoplasmic transmission of the recipient oocyte's mtDNA only, or persists resulting in heteroplasmy (i.e. both donor and recipient mtDNA). Indeed, transmission of donor cell mtDNA ranges from 0% to 63% in preimplantation embryos (Meirelles *et al.*, 2001) and 0% to 59% in live offspring (Takeda *et al.*, 2003; see Table II). This tends to be independent of whether intra- or interspecific or interspecies ECNT or SCNT is performed (St John *et al.*, 2004; Tables II and III), e.g. bovine embryos and offspring derived by both intra- and interspecific NT (Meirelles *et al.*,

2001; Do *et al.*, 2002; Takeda *et al.*, 2003); and in caprine embryos (Jiang *et al.*, 2004) and porcine (Takeda *et al.*, 2006) and *Macaca mulatta* (St John and Schatten, 2004) offspring derived by interspecific ECNT and SCNT. It is thus evident that embryonic and somatic cell mtDNA can escape the selective mechanism that targets and eliminates intra-specific sperm mitochondria in the fertilized oocyte to maintain homoplasmy (Shitara *et al.*, 2000; Sutovsky and Schatten, 2000). Indeed, in the two non-human primates derived by interspecific ECNT, both oocyte and sperm mtDNA contributing to the donor blastomere were transmitted (St John and Schatten, 2004). However, the factors that allow for the large differences in heteroplasmy between individuals remain to be determined experimentally.

In order to determine why donor cell mtDNA might be transmitted, an early study indicated that the amount of mtDNA that was transmitted was proportional to the amount of mtDNA accompanying the embryonic donor cell at the time ECNT was performed. The donor cells were from varying stages of preimplantation development thus containing decreasing levels of mtDNA following division during preimplantation development (Steinborn *et al.*, 1998). However, closer examination of these data suggests that this is perhaps not as decisive an outcome as first thought. A further study set out to understand why donor cell mtDNA persists at levels inconsistent with its original contribution. Intra- and interspecific SCNT-ovine embryos, using donor cells depleted to 0.01% (residual – mtDNA<sup>R</sup>) and 0.1% of their original mtDNA content, were generated and compared with time-matched non-depleted (mtDNA<sup>+</sup>) cells (Lloyd *et al.*, 2006). Surprisingly, donor cell mtDNA persisted to the hatched blastocyst stage for all combinations. This outcome has been attributed to the persistent expression of mtDNA-specific replication factors, such as POLGA, POLGB and TFAM, during preimplantation development, which contrasts with their *in vitro*-derived counterparts (Bowles *et al.*, 2007b).

In interspecies SCNT embryos (iSCNT; see Table III), donor cell mtDNA has been detected at the 16-cell stage in human-bovine crosses (Chang *et al.*, 2003), the blastocyst stage in macaque–rabbit (Yang *et al.*, 2003) and in a small minority of caprine-ovine embryos (4 of 40; range = 2–20+ cell embryos; Bowles *et al.*, 2007b). In this small number of heteroplasmic embryos, significant increases in donor cell mtDNA were observed again suggesting that occasionally selective replication does take place. Although the generation of live offspring is highly unlikely through iSCNT, it remains to be determined whether residual levels of mtDNA would persist and proliferate or be eliminated in differentiating ESCs derived through iSCNT.

It is worth, however, stressing that considerable confusion has been created by the current zoological nomenclature that assigns species status to populations that are often only subspecies. This is very common in domestic strains of animals and their distant ancestors such as *Bos taurus* and *Bos indicus* (cattle), *Capra hirus* and *Capra ibex* (goat) and *Sus scrofa* and *Sus vittatus* (pig). Here, we have collated mtDNA analyses on iSCNT embryos and offspring, based on clear distinctions between species and not as subspecies and interspecific crosses (cf. Tables II and III). However, it should be stressed that performing mtDNA analysis with different detection methods will often result in different levels of mtDNA heteroplasmy being observed, thus we have listed the relative methods used. Several conclusions can be drawn: (i) different tissues will have different mtDNA

**Table II** mtDNA content in cloned embryos, fetuses and offspring generated by intra- and interspecific nuclear transfer.

| Species                                                             | Sample analysed                                                                                                                                  | Degrees of heteroplasmy                                                                                                                                                                                                                                                                                                               | Detection methods                                                                             | References                |
|---------------------------------------------------------------------|--------------------------------------------------------------------------------------------------------------------------------------------------|---------------------------------------------------------------------------------------------------------------------------------------------------------------------------------------------------------------------------------------------------------------------------------------------------------------------------------------|-----------------------------------------------------------------------------------------------|---------------------------|
| Bovine                                                              | Sampled blastomeres, blastocysts, tissues of a newborn clone                                                                                     | NT-blastomere zygotes and blastocysts had similar levels of heteroplasmy (donor cell—11.0% and 14.0%, respectively), 5.8% at the 9- to 16-cell stage. Heteroplasmic levels in NT-fibroblast zygotes—4.7%, 9- to 16-cell—12.9%, blastocysts 2.2%. No donor cell mtDNA detected in gametes or tissues of newborn calf                   | Allele-specific PCR with fluorochrome-specific primers                                        | Ferreira et al. (2007)    |
| Sheep fetal fibroblast                                              | Seven fetuses and five lambs cloned from fetal fibroblasts                                                                                       | Most of the heteroplasmic clones exhibited low levels of heteroplasmy (0.1–0.9%, $n = 6$ ). High levels of heteroplasmy (6.8–46.5%) in 1 clone                                                                                                                                                                                        | Quantitative amplification refractory mutation system (ARMS) PCR                              | Burgstaller et al. (2007) |
| Pig ( <i>S. vittatus</i> and <i>S. scrofa</i> )                     | 4 SCNT pigs derived from <i>S. vittatus</i> nuclear donor cells and <i>S. scrofa</i> recipient oocytes                                           | 0.1–1% heteroplasmy in blood and hair roots. 0–44% in tissues of one animal                                                                                                                                                                                                                                                           | SSCP and agarose gel PCR-RFLP with image analysis and SNP-PCR                                 | Takeda et al. (2006)      |
| Ovine fetal fibroblast with different levels of mtDNA               | 2-cell to hatched blastocyst                                                                                                                     | Donor cell mtDNA persisted in some blastocysts (0.01–0.9%)                                                                                                                                                                                                                                                                            | Allele-specific real-time PCR                                                                 | Lloyd et al. (2006)       |
| Pig ( <i>S. scrofa</i> )                                            | 5 pigs derived from 2 nuclear donor cell types (double nuclear transfer)                                                                         | Donor cell mtDNA eliminated but transmission of first recipient oocyte and zygote mtDNA—bimaternal mtDNA transmission                                                                                                                                                                                                                 | Sequence analysis, RFLP, AS-PCR and primer extension polymorphism analysis                    | St John et al. (2005a, b) |
| Cattle ( <i>B. taurus</i> )                                         | 3 calves                                                                                                                                         | Heteroplasmy detected in skin and blood (1–3.6%)                                                                                                                                                                                                                                                                                      | Agarose gel electrophoresis and image analysis                                                | Theoret et al. (2006)     |
| Cattle ( <i>B. taurus</i> )                                         | 5 calves                                                                                                                                         | Heteroplasmy in skin samples                                                                                                                                                                                                                                                                                                          | AS-PCR on agarose gel                                                                         | Han et al. (2004)         |
| Goat ( <i>C. ibex</i> and <i>C. hircus</i> )                        | 1-, 2-, 4-cell, and morula stage                                                                                                                 | Heteroplasmy only at 1- and 2-cell stage                                                                                                                                                                                                                                                                                              | AS-PCR on agarose gel and DNA sequencing                                                      | Jiang et al. (2004)       |
| Mouse ( <i>Mus musculus domesticus</i> , <i>Mus m. molossinus</i> ) | 25 adult mice derived from 3 nuclear donor cell types                                                                                            | Heteroplasmy in brain, kidney, liver and tail of all but one animal. Amount of donor cell mtDNA depended on donor cell type and tissue with significant differences between sertoli (0.78%) and fibroblast (2.4%) derived mice, and between brain (0.6%) and liver (1.7%) tissues, heteroplasmy detected in all 20 placentae analysed | Allele specific real-time PCR                                                                 | Inoue et al. (2004)       |
| Cattle                                                              | 12 day fetus derived from one donor cell type; 3 recipient oocyte cytoplasms: <i>B. taurus</i> mtDNA type B, type C, and <i>B. indicus</i> mtDNA | Mainly homoplasmic with occasional heteroplasmic at 0.5–0.7%                                                                                                                                                                                                                                                                          | PCR-RFLP on agarose gel<br>Cloned PCR fragment                                                | Hiendleder et al. (2003)  |
| Cattle ( <i>B. taurus</i> )                                         | 16 embryos from 3 nuclear donor cell types Cumulus cells (holstein), ear skin cells (Japanese black) and fetal fibroblasts (Japanese black)      | 3 of 9 NT calves were heteroplasmic with donor cell mtDNA ranging from 0% to 59%                                                                                                                                                                                                                                                      | PCR-mediated single-strand conformation polymorphism analysis and southern blot hybridization | Takeda et al. (2003)      |
| Cattle ( <i>B. taurus</i> )                                         | 1-, 2-, 4-, 8- and 16-cell, morula and blastocysts                                                                                               | Heteroplasmy at all stages                                                                                                                                                                                                                                                                                                            | Allele specific PCR on agarose gel and direct sequencing of PCR product                       | Do et al. (2002)          |
| Cattle ( <i>B. taurus</i> , <i>B. indicus</i> )                     | <i>B. Taurus</i> nucleus and <i>B. indicus</i> mtDNA ( $n = 11$ )                                                                                | 0.6–2.8% heteroplasmy in 4 out of 11                                                                                                                                                                                                                                                                                                  | Allele specific real-time PCR                                                                 | Steinborn et al. (2002)   |
| Cattle ( <i>B. indicus</i> )                                        | Reconstructed oocytes, blastomeres and whole morula, blastocysts and fetal and offspring tissues                                                 | 0–63% in preimplantation embryos; reduction or complete elimination of donor cell mtDNA during development                                                                                                                                                                                                                            | PCR restriction fragment length polymorphism                                                  | Meirelles et al. (2001)   |
| Cattle ( <i>B. taurus</i> )                                         | 6 fetuses and 4 calves derived from 3 nuclear donor cell types                                                                                   | 0.1–4% heteroplasmy in all but one sample in blood, cerebellum, hear, kidney, liver, lung, muscle and skin                                                                                                                                                                                                                            | Allele-specific real-time PCR                                                                 | Steinborn et al. (2000)   |

Continued

**Table II** *Continued*

| Species                                          | Sample analysed                                                                                                                | Degrees of heteroplasmy                            | Detection methods                                    | References                  |
|--------------------------------------------------|--------------------------------------------------------------------------------------------------------------------------------|----------------------------------------------------|------------------------------------------------------|-----------------------------|
| Sheep ( <i>O. aries</i> )                        | 10 sheep derived from 3 nuclear donor cell types                                                                               | No heteroplasmy in blood, milk muscle and placenta | Southern blot hybridization with phosphorimager,     | Evans <i>et al.</i> (1999)  |
| Cattle blastomeres from Japanese back cow morula | 21 cloned calves produced from recipient oocytes of undefined mtDNA genotypes, and 6 cloned calves from defined mtDNA genotype | 20 of 21 calves homoplasmic; 1 calf heteroplasmic  | PCR-mediated single-strand conformation polymorphism | Takeda <i>et al.</i> (1999) |

content at specific developmental stages and in the adult; (ii) preimplantation embryos will carry different mtDNA patterns for cloned offspring when compared with natural fertilization and (iii) the mtDNA content in blastomeres either undergoes replication or escapes degradation during cleavage and can be degraded after the blastocyst stage or lost during somatic cell development, as revealed by the lack of donor cell mtDNA at birth in some offspring.

### What are the consequences of introducing somatic mitochondria and donor cell mtDNA into oocytes?

Most studies of mitochondria in mammalian oocytes and preimplantation stage embryos have focused primarily on their metabolic capacity to generate ATP. However, mitochondria are also involved in other processes such as establishing developmental competence, calcium homeostasis and apoptosis (van Blerkom, 2004). The inner mitochondrial membrane potential, morphological changes and translocation of mitochondria also play key roles in embryo development. In pig, the translocation of mitochondria from the oocyte cortex to the perinuclear area indicates positive developmental potential that was reduced in porcine SCNT embryos compared with their *in vitro* counterparts (Zhong *et al.*, 2008). Through transmission electron microscopy, these authors also demonstrated that unequal donor cell mitochondrial distribution and complex mitochondrial morphologies may influence mitochondrial translocation and affect development. Another report in goat–goat and goat–cattle embryos demonstrated that inter- and intra-species reconstructed embryos have a different pattern of developmental change to that of *in vivo*-produced embryos for mitochondria (Tao *et al.*, 2008). These ultrastructural differences might contribute to the compromised developmental potential of reconstructed embryos. In cloned mice, again, there appears to be no difference observed in the number of mitochondria, but their mitochondria displayed ultrastructural alterations (Han *et al.*, 2008). Interestingly, the authors revealed that the glucose present in the culture medium compensated for the potential effects of ATP-dependent processes being severely compromised during the first 2-cell cycles.

Somatic cell mitochondria do appear to adversely effect embryonic development. For example, it has been demonstrated that development rates to blastocyst of parthenogenetically activated oocytes supplemented with somatic mitochondria decreased in comparison to non-supplemented controls and those supplemented with oocyte cytoplasm (Takeda *et al.*, 2005). Furthermore, SCNT blastocysts

generated with mtDNA<sup>R</sup> donor cells (SFF1 line) had significantly more embryonic cells at blastocyst compared with those generated with non-mtDNA depleted cells (Lloyd *et al.*, 2006). In addition, significantly more caprine-ovine iSCNT embryos generated with mtDNA<sup>R</sup> donor cells reached the 20-cell stage of preimplantation development than those generated with mtDNA<sup>+</sup> cells (Bowles *et al.*, 2007a). To the contrary, transferring mitochondria from granulosa cells seems to boost preimplantation development, especially for those oocytes characterized by poor mtDNA content and cytoplasmic appearance (Hua *et al.*, 2007). The difference between granulosa cells and other somatic cells may therefore be dependent on their differing maturation statuses and requirements for energy.

Although there appears to be a tolerance for interspecific crosses, the mtDNA genomes for different breeds of cattle and pigs have sequence variations in their coding genes. This is reflected in interspecific bovine (Steinborn *et al.*, 2002) and porcine (St John *et al.*, 2005a, b) offspring. It is thus likely that the subtle changes in the amino acid sequences for these two mtDNA genomes would generate an incompatibility that would affect the interactions with closely located nuclear-encoded polypeptides within the same complex of the ETC. Indeed, during the embryo-fetal period, expression of a mutated gene in specific tissues can attribute to the failure of the respiratory chain complex assembly and function (Minai *et al.*, 2008). It has been suggested that mtDNA heteroplasmy also may induce incompatibility between the nucleus and cytoplasm, which will again inhibit the development of cloned embryos (Chen *et al.*, 2002; Bowles *et al.*, 2007a, b, 2008), especially at the time of genomic activation (Sansinena *et al.*, 2005). A recent report in cat-bovine cloned embryos demonstrated that the developmental block, which normally occurs just after EGA, was associated with the presence of foreign mtDNA (Thongphakdee *et al.*, 2008). In a study of minke whale iSCNT, the granulosa–cumulus cells had the ability to dedifferentiate in bovine and porcine oocytes up to the 4-cell stage, which is again indicative of developmental block at EGA and mitochondrial incompatibility between the recipient oocytes and donor cells (Ikumi *et al.*, 2004). When using iSCNT, it is thus critical to choose compatible donor and recipient cells. Furthermore, the regulation of mtDNA copy number in the preimplantation embryo may affect outcome. For example, in some species, such as mouse, the number of mtDNA copies/embryo is stable during cleavage, with subsequent blastomeres having fewer copies of mtDNA until replication begins post-implantation (Thundathil *et al.*, 2005), whereas domestic species, such as cows and pigs, significantly reduce their mtDNA content during preimplantation

**Table III** mtDNA content in cloned embryos, fetuses and offspring generated by interspecies nuclear transfer.

| Donor cell                                           | Recipient oocyte                        | Sample analysed                                                                                                                  | Degree of heteroplasmy                                                                                                                                                                                                                                                                                                    | Detection methods                                                       | Reference                  |
|------------------------------------------------------|-----------------------------------------|----------------------------------------------------------------------------------------------------------------------------------|---------------------------------------------------------------------------------------------------------------------------------------------------------------------------------------------------------------------------------------------------------------------------------------------------------------------------|-------------------------------------------------------------------------|----------------------------|
| Mixed-breed domestic cat fibroblasts                 | Bovine                                  | 1-, 2-, 4- and 8-cell stage embryos                                                                                              | Cat mtDNA stable from 1- to 8-cell. Bovine mtDNA significantly lower at the 8-cell stage than 4-cell stage                                                                                                                                                                                                                | Quantitative PCR                                                        | Thongphakdee et al. (2008) |
| Goat fetal fibroblasts                               | Sheep                                   | 1-, 2- and 4-cell embryos, morula and blastocyst                                                                                 | Pre-morula stage, goat mtDNA 2.0; 0.012 at blastocyst stage.                                                                                                                                                                                                                                                              | Real-time PCR                                                           | Ma et al. (2008a, b)       |
| Ovine fetal fibroblast                               | Bovine                                  | Individual blastocysts and blastomeres                                                                                           | Ovine mtDNA constant at 1% from 1- to 8-cell stage, 0.6% at 16-cell stage and 0.1% at blastocyst stage.                                                                                                                                                                                                                   | Real-time PCR                                                           | Hua et al. (2008)          |
| Postmortem wolf somatic cells ( <i>Canis lupus</i> ) | Dog                                     | Six cloned wolf pups                                                                                                             | Homoplasmic for recipient oocyte mtDNA                                                                                                                                                                                                                                                                                    | Species specific PCR on agarose gel electrophoresis and DNA sequencing  | Oh et al. (2008)           |
| Cattle ( <i>B. taurus</i> )                          | Rabbit ( <i>Oryctolagus cuniculus</i> ) | 1-, 2-, 4-/8-cell, morula and blastocyst embryos from: (i) heteroplasmic SCNT animal donor; and (ii) a homoplasmic nuclear donor | Heteroplasmy detected at all stages of preimplantation. Rabbit mtDNA remained constant to the morula stage and increased sharply in both types of blastocyst. Bovine mtDNA remained constant in SCNT donor cell group during preimplantation development but decreased sharply in the homoplasmic donor group post-morula | Species specific real-time PCR                                          | Jiang et al. (2006)        |
| Ibex ( <i>C. ibex</i> )                              | Rabbit ( <i>O. cuniculus</i> )          | 2-, 4-, 8- and 16-cell morula and blastocyst embryos                                                                             | Heteroplasmy detected at all stages; rabbit mtDNA increased from the 16-cell stage. Ibex mtDNA decreased after 16-cell stage                                                                                                                                                                                              | Species specific PCR on agarose gel electrophoresis and DNA sequencing  | Jiang et al. (2005)        |
| Human granulosa and fibroblast cells                 | Bovine                                  | Preimplantation stages embryos                                                                                                   | Most embryos heteroplasmic to blastocyst stage                                                                                                                                                                                                                                                                            | Species specific PCR and DNA sequencing                                 | Illmensee et al. (2006)    |
| Takin ( <i>Budorcas taxicolor</i> )                  | Yak ( <i>Bos grunniens</i> )            | 2 blastocysts                                                                                                                    | Heteroplasmy in both blastocysts                                                                                                                                                                                                                                                                                          | Species specific PCR on agarose gel electrophoresis and DNA sequencing  | Li et al. (2006)           |
| Macaque ( <i>Macaca multatta</i> )                   | Rabbit ( <i>O. cuniculus</i> )          | 1-, 2-, 4-, 8- and 16-cell, morula, blastocyst                                                                                   | Macaque mtDNA: 2.0% (1-cell), 1.3% (2-cell), 1.7% (4-cell), 0.6% (8-cell), 0.8% (16-cell), 1.3% (morula) and 0.011% blastocyst                                                                                                                                                                                            | Species-specific real-time PCR                                          | Yang et al. (2004)         |
| Red common carp                                      | Goldfish                                | Blastula, gastrula, somite, muscular reaction, blood circulation, larval and adult stages                                        | Blastulae all heteroplasmic. In late stage embryos post-vascularization only recipient oocyte mtDNA detected                                                                                                                                                                                                              | Species specific PCR on agarose gel electrophoresis with image analysis | Sun et al. (2005)          |
| Human ( <i>Homo sapiens</i> )                        | Bovine ( <i>B. taurus</i> )             | 2-, 4-, 8- and 16-cell, morula and blastocysts                                                                                   | Heteroplasmic to 16-cell stage. Homoplasmic post-morula stage                                                                                                                                                                                                                                                             | Species specific PCR on agarose gel with image analysis, DNA sequencing | Chang et al. (2003)        |
| Human ( <i>H. sapiens</i> )                          | Rabbit ( <i>O. cuniculus</i> )          | Blastocysts                                                                                                                      | Heteroplasmic                                                                                                                                                                                                                                                                                                             | <i>In situ</i> hybridization mtDNA interspecies PCR                     | Chen et al. (2003)         |
| Macaque ( <i>M. multatta</i> )                       | Rabbit ( <i>O. cuniculus</i> )          | 1-, 2-, 4-, 8- and 16-cell, morula and blastocyst                                                                                | Heteroplasmy detected at all stages.                                                                                                                                                                                                                                                                                      | Species specific PCR on agarose gel, DNA sequencing                     | Yang et al. (2003)         |
| Giant panda ( <i>Ailuropoda melanoleuca</i> )        | Rabbit ( <i>O. cuniculus</i> )          | Blastocysts and 2 fetuses                                                                                                        | Heteroplasmy detected in blastocysts. Both fetuses homoplasmic for donor cell                                                                                                                                                                                                                                             | Species specific PCR on agarose gel, sequencing of PCR product          | Chen et al. (2002)         |
| Gaur ( <i>Bos gaurus</i> )                           | Cattle ( <i>B. taurus</i> )             | 3 fetuses                                                                                                                        | No heteroplasmy in brain eye, gonad, hear, intestine, kidney, liver, lung, muscle skin and tongue                                                                                                                                                                                                                         | PCR-PFLP and phosphorimager                                             | Lanza et al. (2000)        |

development with mtDNA replication first taking place as the expanded blastocyst forms (May-Panloup *et al.*, 2005; Spikings *et al.*, 2007). Indeed, this outcome may merely reflect a difference between domestic and non-domestic mammals.

### Is there an association between the genetic distance of donor cell mtDNA and recipient oocyte mtDNA?

A small-scale study comparing the effects of haplotype between two breeds of cattle demonstrated that one mtDNA lineage produced a greater number of blastocysts following SCNT (Bruggerhoff *et al.*, 2002) and the other showed improved developmental competence following IVF (Tamassia *et al.*, 2004). In SCNT-bovine embryos, divergence up to 0.0787% is tolerable for the generation of live offspring (Bowles *et al.*, 2008). In SCNT-ovine embryos, divergence up to 0.0391% appears to be tolerable for development to blastocyst, with the propagation of *Ovis aries* using *Ovis musimon* oocytes providing the limits for the generation of live offspring (Loi *et al.*, 1998), being ~2 million years apart. However, a 4-fold increase (mean = 0.4114%) in genetic distance, i.e. by generating caprine-ovine interspecific embryos, resulted in the failure of development to blastocyst (Bowles *et al.*, 2007b).

A model approach using handmade cloning and phylogenetic analysis has gone some way to clarifying the relationship between donor cell and recipient oocyte mtDNA (Bowles *et al.*, 2008). Handmade clones can be generated by fusing a donor cell to one or more enucleated oocytes of varying genetic distance to determine whether the donor cell will preferentially replicate a population of mtDNA that is closer or genetically more divergent. The outcomes of these studies demonstrated that, within limits of genetic distance, the donor cell favours a genetically more diverse mtDNA haplotype to that of its own with the most divergent genetic distance being at 0.0787%. Fusion with very close genetic partners appears to hinder development.

### What can be learnt from other cellular models?

Cytoplasmic hybrids, commonly known as cybrids, have been used to study nuclear–cytoplasmic interactions in a variety of species. This technology requires either the karyoplast to be completely or partially depleted of its mtDNA and it is then fused to an enucleated cytoplasm (King and Attardi, 1989). The resultant fusions can then be used to understand either the proliferation of mtDNA mutations for specific cells in the disease state or the interactions between a nucleus from one species with a population of mtDNA from another. The latter approach provides a significant amount of knowledge for those wishing to generate iSCNT-derived embryos and ESCs. For example, the generation of mouse–rat cybrids, where rat mtDNA was efficiently replicated, transcribed and translated by the mouse nuclear transcription and replication factors, had decreased ATP output and oxygen consumption, and increased levels of cellular lactate and reduced activity in complexes I, III and IV of the ETC compared with the parental cell lines and mouse–mouse cybrids (Barrientos *et al.*, 1998; Dey *et al.*, 2000; McKenzie and Trounce, 2000). Similarly, in murine–murine cybrids where the mtDNA mutation was homoplasmic, there was compromised OXPHOS and COX activity with also decreased levels of mitochondrial translation (McKenzie and Trounce, 2000). Prolonged culture of

one cybrid resulted in a shift from 30% to 80% mutant, which then remained stable throughout culture, perhaps similar to the transmission of mtDNA following interspecies NT, where the accumulation of one population of mtDNA may outnumber the other dependent perhaps on the nuclear background of the cell. Similar outcomes have been observed as primate mtDNA can only be replicated by a human nucleus when the human mtDNA has been eliminated (Barrientos *et al.*, 1998). In this instance, the activities of complexes II–V were unaltered, but there was a deficiency in complex I activity.

### Mitochondrial DNA replication and transmission following induced pluripotency

Induced pluripotent cells (iPSCs) are somatic cells that have been induced to become ESC-like due to the introduction of defined factors (Takahashi and Yamanaka, 2006). They then express key pluripotent markers such as *Oct4*, *Nanog* and *Sox-2* and have the ability to differentiate into multiple cell types. It however remains to be determined whether such cells have the ability to regulate their mtDNA copy number in their undifferentiated state as ESCs do. It further needs to be demonstrated whether these cells can effectively regulate their patterns of mtDNA replication as the process of differentiation takes place in ESCs (Facucho-Oliveira *et al.*, 2007). It is unlikely that those cells generated through NT would be able to do so, due to the up-regulation of the mtDNA replication factors during early embryonic development (Bowles *et al.*, 2007b). However, the iPSCs should, in line with pluripotent cells (Facucho-Oliveira *et al.*, 2007; Facucho-Oliveira and St John, 2009), be able to demonstrate low levels of mtDNA replication to maintain existing populations. Attempts at reprogramming cells using cell fusion (Sumer *et al.*, 2009), where an adult cell is fused to an ESC, may cause several problems in terms of the regulation of mtDNA. These may include heteroplasmy, because of two different sources of cells being used to generate the newly fused reprogrammed cell, and the failure to adopt appropriate numbers of mtDNA copies. As reprogrammed cells have been proposed as models that can be used for the study of specific diseases and to screen drugs for their efficacy (Bowles *et al.*, 2007a), they need to be carefully investigated to determine their appropriateness for such analyses. This is because such experimental protocols may contain two experimental variables, namely increased numbers of mtDNA copy and/or heteroplasmy, which may result in irregular ATP production and the genetic rearrangement associated with the particular disease. Consequently, it would not be clear from the experimental outcome whether the cellular dysfunction arose through the genetic rearrangement or the cell's inability to generate sufficient levels of ATP through OXPHOS. Equally so, the inability of the drug to induce, e.g. appropriate calcium oscillations in neuronal or cardiac cells, might also be due to impaired OXPHOS function. However, as such cells offer considerable hope as clinical entities, then it is worth investigating whether it is feasible to simply regulate the mtDNA content of these cells so that they are suitable for therapeutic and experimental use.

### mtDNA segregation

The segregation of mtDNA molecules tends to follow a pattern of random genetic drift (reviewed in Shoubridge and Wai, 2007).

Consequently, it is not possible to predict which cell types or tissues mutant molecules will migrate to during early development. This is the case for both somatic and germ cells and specifically relevant to female primordial germ cells (PGCs), which, when harbouring mutant molecules, would thus ensure their continued transmission to subsequent generations. PGCs originate from the extra-embryonic endoderm and migrate to the germinal ridge (Surani et al., 2007). At this stage, they contain ~200 copies of mtDNA and maintain relatively fewer numbers during the early stages of oogenesis (Smith and Alcivar, 1993; Cao et al., 2007; Cree et al., 2008; Fig. 4). As PGCs differentiate and progress from meiosis I to II, mtDNA is clonally expanded (Smith and Alcivar, 1993). Consequently, those mature mouse oocytes that are competent for the process of fertilization or oocyte reconstruction will have between 180 000 and 200 000 mtDNA copies (Cao et al., 2007; Cree et al., 2008; Wai et al., 2008) with 1–2 copies/mitochondrion (Piko and Matsumoto, 1976; Piko and Taylor, 1987), whereas bovine (May-Panloup et al., 2005), porcine (Spikings et al., 2007) and human (Steuerwald et al., 2000; Reynier et al., 2001; Almeida-Santos et al., 2006) oocytes have between 100 000 and 700 000 copies (Fig. 4). Consequently, the combination of random genetic drift and clonal expansion of mtDNA would explain the large variation in mutant molecules found within the cohorts of oocytes from those women who are potential carriers of mtDNA mutations. For example, mtDNA mutation:wild type for a specific mitochondrial disorder, MELAS, ranged from 0% to 97% (Blok et al., 1997).

Following fertilization of the oocyte, mtDNA copy number remains constant during mouse preimplantation development up to the morula stage but is reduced in porcine (Spikings et al., 2007) and bovine (May-Panloup et al., 2005) embryos. mtDNA replication is then initiated at the blastocyst stage in those mammalian species so far investigated (May-Panloup et al., 2005; Thundathil et al., 2005; Spikings et al., 2007). However, this replication is specific to the trophectodermal cells, the cells that give rise to the placenta, whereas those cells giving rise to the embryo or ESCs, the ICM cells, have very few mitochondria present and thus copies of the mtDNA genome (Spikings et al., 2007). The ICM cells are likely to continue to reduce their mtDNA copy number as they continue to divide before they undergo gastrulation, as evidenced by human and mouse ESCs having as few as 10–20 mitochondria (St John et al., 2005a, b) containing between 30 and 45 copies of the mitochondrial genome (Facucho-Oliveira et al., 2007). This selective reduction in mtDNA copies in those cells giving rise to the fetus ensures that very few copies are available for clonal amplification in gametes and other tissues and that the maternal homoplasmic transmission of a single type of molecule is transmitted to the next generation. This process, otherwise known as the mitochondrial bottleneck (Hauswirth and Laipis, 1982), also ensures that mutated molecules are either eliminated or fixed in the female germline according to the severity of the mutation within a generation so that either quality mtDNA is transmitted or the mutation is lethal and the oocytes do not mature (Fan et al., 2008; Stewart et al., 2008). However, as the female PGCs, which constitute the vehicle for the recycling of mtDNA from one generation to the next, possess ~200 copies of mtDNA, this represents a potential small increase in mtDNA copy and suggests that the bottleneck may have occurred prior to the establishment of the PGCs.

The variable transmission of mtDNA has questioned the feasibility of using preimplantation genetic diagnosis (PGD) on embryos generated following either *in vitro* fertilization or intra-cytoplasmic sperm injection protocols to determine whether individual preimplantation blastomeres contain equal loading for mutant molecules. Interestingly, although mutant load can be different in various mature cell types (reviewed in McFarland et al., 2007), there appears to be uniformity in individual blastomeres (Dean et al., 2003) suggesting that segregation is a post-gastrulation event. Although this is a reassuring outcome, it suggests that PGD is only useful as a predictor that mature cells might have high mutant mtDNA loading when a critical threshold of mutant loading is reached in preimplantation embryos. For those preimplantation embryos with low levels of mutation, it can inform patients that their offspring would most unlikely be affected (Poulten et al., 2009). However, the overriding question is: how sure can we be?

As mtDNA replication in fetal cells is initiated post-gastrulation and from a few molecules present in uncommitted cells, it allows individual cell types to be populated with the appropriate numbers of mtDNA copies to match their requirements for OXPHOS-derived ATP (Moyes et al., 1998). Such examples would be neuronal, muscle and cardiac-type cells where neuronal cells would have between 8 and 10 copies/mitochondrion (Sato and Kuroiwa, 1991). It is likely that there is a refinement of mtDNA copy at various stages of development and these are likely to be linked to the expression of certain genes during the various different stages of development (Facucho-Oliveira et al., 2007; Facucho-Oliveira and St John, 2009). Early phases of replication are likely to be associated with replenishment of a genome and also to determine whether the replication machinery is capable of sustaining phasic changes, thus ensuring that, at various stages of differentiation, the cell is capable of adaptation. Consequently, PGD may not reflect later stage outcomes. This is further likely as it appears that mtDNA rearrangements and wild-type molecules are able to intermix so that they do not remain as separate entities within distinct organelles or cells (Nakada et al., 2001).

### Does heteroplasmy following reproductive technologies have implications for embryo, fetal and offspring survival and wellbeing?

Currently, there are no effective intervention strategies available to prevent the transmission of mtDNA disease from mother to offspring. Experimental approaches concentrate on determining whether germinal vesicle or pro-NT might be appropriate approaches. In this case, the germinal vesicle or pronuclei from the affected oocyte would be transferred into an enucleated egg that was not carrying the mutant population (Meirelles and Smith, 1998). The degree of donor cell transmission that arises or transfer of donor mitochondria following cytoplasmic transfer when at its higher levels could mimic conditions associated with mitochondrial disease. Studies, for example, using mouse strains with variants in the coding sequences between the two strains would be similar to clinical-onset heteroplasmy and would produce similar outcomes to those observed following SCNT when different breeds of cattle and pig contributed by a donor cell and a recipient oocyte. As previously demonstrated, some replication of such mtDNA can take place during preimplantation development (Meirelles and Smith, 1998) and persist at high levels in a few offspring

(Sato *et al.*, 2005). Consequently, it is worth questioning whether the degree of mtDNA heteroplasmy in cloned offspring would indeed account for some of the phenotypic diseases observed from NT. Although there is no direct evidence currently to support this, there is substantive evidence that is associated with those malformations in tissues from fetuses and offspring following SCNT (Cibelli *et al.*, 2002). A recent study has also demonstrated that donor ooplasm transfer can affect growth in early life with interspecific germinal vesicle transfer causing growth abnormalities post-natally (Cheng *et al.*, 2009). Such tissues that might be affected are lung, heart and liver (Bowles *et al.*, 2008), which are high ATP users and would therefore be more likely to be indicative of failure to produce sufficient compatible genomes for the ETC. This would be further exaggerated following iSCNT where the nuclear and mtDNA-encoded subunits of the ETC would show varying degrees of incompatibility.

As the transmission of donor cell mtDNA in cloned offspring could also be explained by random genetic drift, as these molecules tend to segregate in a non-uniform manner, the up-regulation of mtDNA replication factors during preimplantation development (Bowles *et al.*, 2007a, b) and their preferential selection for one molecule over another (Bowles *et al.*, 2008) will influence the number of molecules present as segregation takes place. Consequently, any assisted reproductive technology that uses an oocyte cytoplasm to reprogramme the donor cell and allows mixing of mtDNA populations will affect any PGD outcomes as the population present in the preimplantation embryo will continue to be replicated unlike its fertilized counterpart and would be only predictive of that stage of development. This outcome may be equally valid for the transfer of a germinal vesicle or a pronuclei which will bring some accompanying mtDNA as part of the transfer. Consequently, entire elimination of donor cell mtDNA would be perhaps an appropriate safeguard for such approaches (Bowles *et al.*, 2007a, b). A recent attempt in *M. mulatta* has suggested that this might be achieved (Tachibana *et al.*, 2009) but these results must be viewed with considerable caution as it still needs to be verified whether the transferred spindle has accompanying mtDNA and whether this was transmitted to various tissues of the offspring.

## Conclusions

mtDNA transmission and replication from the gamete through the preimplantation embryo into the fetus and into the offspring is a highly regulated process where mtDNA replication is initiated at precise stages throughout development. The task for scientists at the moment is to elicit when these key stages are and how many of these key stages exist. Once we have a clearer understanding of these, it may be possible to regulate mtDNA transmission in order to prevent the onset of severe mitochondrial diseases which affects the quality of life of ~1:1 000 in northeast England (Schaefer *et al.*, 2008) and 1:6000 for A3243G mutation in Finland (Majamma *et al.*, 1998; McFarland *et al.*, 2007). We have approaches that may be able to regulate mtDNA transmission in the new offspring through assisted reproductive technologies. The task for scientists now is to develop approaches using stem cells that will allow dysfunctional tissues affected by mtDNA to be replaced with non-heteroplasmic populations which will alleviate the severe phenotype on the offspring.

## Funding

We acknowledge the Medical Research Council and the British Heart Foundation for their generous support.

## References

- Acton BM, Lai I, Shang X, Jurisicova A, Casper RF. Neutral mitochondrial heteroplasmy alters physiological function in mice. *Biol Reprod* 2007; **77**:569–576.
- Alam TI, Kanki T, Muta T, Ukaji K, Abe Y, Nakayama H, Takio K, Hamasaki N, Kang D. Human mitochondrial DNA is packaged with TFAM. *Nucleic Acids Res* 2003; **31**:1640–1645.
- Almeida Santos T, El Shourbagy T, St John JC. Mitochondrial content reflects oocyte variability and fertilization outcome. *Fertil Steril* 2006; **85**:584–591.
- Amaral A, Ramalho-Santos J, St John JC. The expression of polymerase gamma and mitochondrial transcription factor A and the regulation of mitochondrial DNA content in mature human sperm. *Hum Reprod* 2007; **22**:1585–1596.
- Anderson S, Bankier AT, Barrell BG, de Bruijn MH, Coulson AR, Drouin J, Eperon IC, Nierlich DP, Roe BA, Sanger F *et al.* Sequence and organization of the human mitochondrial genome. *Nature* 1981; **290**:457–465.
- Baharvand H, Matthaei KI. The ultrastructure of mouse embryonic stem cells. *Reprod Biomed Online* 2003; **7**:330–335.
- Bain G, Kitchens D, Yao M, Huettner JE, Gottlieb DI. Embryonic stem cells express neuronal properties in vitro. *Dev Biol* 1995; **168**:342–357.
- Barrientos A, Kenyon L, Moraes CT. Human xenomitochondrial cybrids. Cellular models of mitochondrial complex I deficiency. *J Biol Chem* 1998; **273**:14210–14217.
- Barritt JA, Brenner CA, Malter HE, Cohen J. Rebuttal: interooplasmic transfers in humans. *Reprod Biomed Online* 2001; **3**:47–48.
- Batten BE, Albertini DF, Ducibella T. Patterns of organelle distribution in mouse embryos during preimplantation development. *Am J Anat* 1987; **178**:204–213.
- Beese LS, Derbyshire V, Steitz TA. Structure of DNA polymerase I Klenow fragment bound to duplex DNA. *Science* 1993a; **260**:352–355.
- Beese LS, Friedman JM, Steitz TA. Crystal structures of the Klenow fragment of DNA polymerase I complexed with deoxynucleoside triphosphate and pyrophosphate. *Biochem* 1993b; **32**:14095–14101.
- Bernstein JA, Richardson CC. Characterization of the helicase and primase activities of the 63-kDa component of the bacteriophage T7 gene 4 protein. *J Biol Chem* 1989; **264**:13066–13073.
- Bianchi ME, Agresti A. HMG proteins: dynamic players in gene regulation and differentiation. *Curr Opin Genet Dev* 2005; **15**:496–506.
- Birky CW Jr. Uniparental inheritance of mitochondrial and chloroplast genes: mechanisms and evolution. *Proc Natl Acad Sci USA* 1995; **92**:11331–11338.
- Birky CW Jr. The inheritance of genes in mitochondria and chloroplasts: laws, mechanisms, and models. *Annu Rev Genet* 2001; **35**:125–148.
- Blok RB, Gook DA, Thorburn DR, Dahl HH. Skewed segregation of the mtDNA nt 8993 (T → G) mutation in human oocytes. *Am J Hum Genet* 1997; **60**:1495–1501.
- Bogenhagen DF, Clayton DA. The mitochondrial DNA replication bubble has not burst. *Trends Biochem Sci* 2003; **28**:35–360.
- Bogenhagen DF, Rousseau D, Burke S. The layered Structure of human mtDNA nucleoid. *J Biol Chem* 2007; **283**:3665–3675.
- Boulet L, Karpatis G, Shoubridge EA. Distribution and threshold expression of the tRNA(Lys) mutation in skeletal muscle of patients with myoclonic



- epilepsy and ragged-red fibers (MERRF). *Am J Hum Genet* 1992; **51**:1187–1200.
- Bowles EJ, Campbell KH, St John JC. Nuclear transfer: preservation of a nuclear genome at the expense of its associated mtDNA genome(s). *Curr Top Dev Biol* 2007a; **77**:251–290.
- Bowles EJ, Lee JH, Alberio R, Lloyd RE, Stekel D, Campbell KH, St John JC. Contrasting effects of in vitro fertilization and nuclear transfer on the expression of mtDNA replication factors. *Genetics* 2007b; **176**:1511–1526.
- Bowles EJ, Tecirlioglu RT, French AJ, Holland MK, St John JC. Mitochondrial DNA transmission and transcription after somatic cell fusion to one or more cytoplasts. *Stem Cells* 2008; **26**:775–782.
- Brenner CA, Barritt JA, Willadsen S, Cohen J. Mitochondrial DNA heteroplasmy after human ooplasmic transplantation. *Fertil Steril* 2000; **74**:573–578.
- Bruggerhoff K, Zakhartchenko V, Wenigerkind H, Reichenbach HD, Prella K, Schermthaler W, Alberio R, Kuchenhoff H, Stojkovic M, Brem G et al. Bovine somatic cell nuclear transfer using recipient oocytes recovered by ovum pick-up: effect of maternal lineage of oocyte donor. *Biol Reprod* 2002; **66**:367–373.
- Burgstaller JP, Schinogel P, Dinnyes A, Muller M, Steinborn R. Mitochondrial DNA heteroplasmy in ovine fetuses and sheep cloned by somatic cell nuclear transfer. *BMC Dev Biol* 2007; **7**:141.
- Campbell KH, McWhir J, Ritchie WA, Wilmut I. Sheep cloned by nuclear transfer from a cultured cell line. *Nature* 1996; **380**:64–66.
- Cao L, Shitara H, Horii T, Nagao Y, Imai H, Abe K, Hara T, Hayashi J, Yonekawa H. The mitochondrial bottleneck occurs without reduction of mtDNA content in female mouse germ cells. *Nat Genet* 2007; **39**:386–390.
- Carrodeguas JA, Kobayashi R, Lim SE, Copeland WC, Bogenhagen DF. The accessory subunit of *Xenopus laevis* mitochondrial DNA polymerase gamma increases processivity of the catalytic subunit of human DNA polymerase gamma and is related to class II aminoacyl-tRNA synthetases. *Mol Cell Biol* 1999; **19**:4039–4046.
- Carrodeguas JA, Theis K, Bogenhagen DF, Kisker C. Crystal structure and deletion analysis show that the accessory subunit of mammalian DNA polymerase gamma, Pol gamma B, functions as a homodimer. *Mol Cell* 2001; **7**:43–54.
- Cavalier-Smith T. Predation and eukaryote cell origins: a coevolutionary perspective. *Int J Biochem Cell Biol* 2009; **41**:307–322.
- Chang KH, Lim JM, Kang SK, Lee BC, Moon SY, Hwang WS. Blastocyst formation, karyotype, and mitochondrial DNA of interspecies embryos derived from nuclear transfer of human cord fibroblasts into enucleated bovine oocytes. *Fertil Steril* 2003; **80**:1380–1387.
- Chen XJ, Butow RA. The organization and inheritance of the mitochondrial genome. *Nat Rev Genet* 2005; **6**:815–825.
- Chen L, Daley GQ. Molecular basis of pluripotency. *Hum Mol Genet* 2008; **17**:R23–R27.
- Chen DY, Wen DC, Zhang YP, Sun QY, Han ZM, Liu ZH, Shi P, Li JS, Xiangyu JG, Lian L et al. Interspecies implantation and mitochondria fate of panda-rabbit cloned embryos. *Biol Reprod* 2002; **67**:637–642.
- Chen Y, He ZX, Liu A, Wang K, Mao WW, Chu JX, Lu Y, Fang ZF, Shi YT, Yang QZ et al. Embryonic stem cells generated by nuclear transfer of human somatic nuclei into rabbit oocytes. *Cell Res* 2003; **13**:251–263.
- Cheng Y, Wang K, Kellam LD, Lee YS, Liang CG, Han Z, Mtango NR, Latham KE. Effects of ooplasm manipulation on DNA methylation and growth of progeny in mice. *Biol Reprod* 2009; **80**:464–472.
- Chinnery PF, Andrews RM, Turnbull DM, Howell NN. Leber hereditary optic neuropathy: does heteroplasmy influence the inheritance and expression of the G11778A mitochondrial DNA mutation? *Am J Med Genet* 2001; **98**:235–243.
- Cho YM, Kwon S, Pak YK, Seol HW, Choi YM, Park do J, Park KS, Lee HK. Dynamic changes in mitochondrial biogenesis and antioxidant enzymes during the spontaneous differentiation of human embryonic stem cells. *Biochem Biophys Res Commun* 2006; **348**:1472–1478.
- Choi YS, Kim S, Kyu Lee H, Lee KU, Pak YK. In vitro methylation of nuclear respiratory factor-1 binding site suppresses the promoter activity of mitochondrial transcription factor A. *Biochem Biophys Res Commun* 2004; **314**:118–122.
- Chung S, Dzeja PP, Faustino RS, Perez-Terzic C, Behfar A, Terzic A. Mitochondrial oxidative metabolism is required for the cardiac differentiation of stem cells. *Nat Clin Pract Cardiovasc Med* 2007; **4**(Suppl 1):S60–S67.
- Cibelli JB, Campbell KH, Seidel GE, West MD, Lanza RP. The health profile of cloned animals. *Nat Biotech* 2002; **20**:13–14.
- Cohen J, Scott R, Schimmel T, Levron J, Willadsen S. Birth of infant after transfer of anucleate donor oocyte cytoplasm into recipient eggs. *Lancet* 1997; **350**:186–187.
- Cree LM, Samuels DC, de Sousa Lopes SC, Rajasimha HK, Wonnapijit P, Mann JR, Dahl HH, Chinnery PF. A reduction of mitochondrial DNA molecules during embryogenesis explains the rapid segregation of genotypes. *Nat Genet* 2008; **40**:249–254.
- Danan C, Sternberg D, Van Steirteghem A, Cazeneuve C, Duquesnoy P, Besmond C, Goossens M, Lissens W, Amselem S. Evaluation of parental mitochondrial inheritance in neonates born after intracytoplasmic sperm injection. *Am J Hum Genet* 1999; **65**:463–473.
- Dani C, Smith AG, Dessolin S, Leroy P, Staccini L, Villageois P, Darimont C, Ailhaud G. Differentiation of embryonic stem cells into adipocytes in vitro. *J Cell Sci* 1997; **110**:1279–1285.
- Dean NL, Battersby BJ, Ao A, Gosden RG, Tan SL, Shoubridge EA, Molnar MJ. Prospect of preimplantation genetic diagnosis for heritable mitochondrial DNA diseases. *Mol Hum Reprod* 2003; **9**:631–638.
- Dey R, Barrientos A, Moraes CT. Functional constraints of nuclear-mitochondrial DNA interactions in xenomitochondrial rodent cell lines. *J Biol Chem* 2000; **275**:31520–31527.
- Di Re M, Sembongi H, He J, Reyes A, Yasukawa T, Martinsson P, Bailey LJ, Goffart S, Boyd-Kirkup JD, Wong TS et al. The accessory subunit of mitochondrial DNA polymerase  $\gamma$  determines the DNA content of mitochondrial nucleoids in human cultured cells. *Nucleic Acids Res* 2009; doi:10.1093/nar/gkp614.
- Diez-Sanchez C, Ruiz-Pesini E, Lapena AC, Montoya J, Perez-Martos A, Enriquez JA, Lopez-Perez MJ. Mitochondrial DNA content of human spermatozoa. *Biol Reprod* 2003; **68**:180–185.
- Do JT, Lee JW, Lee BY, Kim SB, Ryoo ZY, Chung KS. Fate of donor cell mitochondrial DNA in cloned bovine embryos produced by microinjection of cumulus cells. *Biol Reprod* 2002; **67**:555–560.
- Ekstrand MI, Falkenberg M, Rantanen A, Park CB, Gaspari M, Hultenby K, Rustin P, Gustafsson CM, Larsson NG. Mitochondrial transcription factor A regulates mtDNA copy number in mammals. *Hum Mol Genet* 2004; **13**:935–944.
- El Shourbagy SH, Spikings EC, Freitas M, St John JC. Mitochondria directly influence fertilisation outcome in the pig. *Reproduction* 2006; **131**:233–245.
- Evans MJ, Gurer C, Loike JD, Wilmut I, Schnieke AE, Schon EA. Mitochondrial DNA genotypes in nuclear transfer-derived cloned sheep. *Nat Genet* 1999; **23**:90–93.
- Facucho-Oliveira JM, St John JC. The relationship between pluripotency and mitochondrial DNA proliferation during early embryo development and embryonic stem cell differentiation. *Stem Cell Rev Rep* 2009; **5**:140–158.
- Facucho-Oliveira JM, Alderson J, Spikings EC, Egginton S, St John JC. Mitochondrial DNA replication during differentiation of murine embryonic stem cells. *J Cell Sci* 2007; **120**:4025–4034.

- Falkenberg M, Gaspari M, Rantanen A, Trifunovic A, Larsson NG, Gustafsson CM. Mitochondrial transcription factors B1 and B2 activate transcription of human mtDNA. *Nat Genet* 2002;**31**:289–294.
- Fan W, Waymire KG, Narula N, Li P, Rocher C, Coskun PE, Vannan MA, Narula J, MacGreggor GR, Wallace DC. A mouse model of mitochondrial disease reveals germline selection against severe mtDNA mutations. *Science* 2008;**319**:958–962.
- Ferreira CR, Meirelles FV, Yamazaki W, Chiaratti MR, Meo SC, Perecin F, Smith LC, Garcia JM. The kinetics of donor cell mtDNA in embryonic and somatic donor cell-derived bovine embryos. *Cloning Stem Cells* 2007;**9**:618–629.
- Fisher RP, Lisowsky T, Parisi MA, Clayton DA. DNA wrapping and bending by a mitochondrial high mobility group-like transcriptional activator protein. *J Biol Chem* 1992;**267**:3358–3367.
- Fraichard A, Chassande O, Bilbaut G, Dehay C, Savatier P, Samarut J. In vitro differentiation of embryonic stem cells into glial cells and functional neurons. *J Cell Sci* 1995;**108**:3181–3188.
- Fridlender B, Weissbach A. DNA polymerases of tumor virus: specific effect of ethidium bromide on the use of different synthetic templates. *Proc Natl Acad Sci USA* 1971;**68**:3116–3119.
- Fridlender B, Fry M, Bolden A, Weissbach A. A new synthetic RNA-dependent DNA polymerase from human tissue culture cells (HeLa-fibroblast-synthetic oligonucleotides-template-purified enzymes). *Proc Natl Acad Sci USA* 1972;**69**:452–455.
- Fryer A, Appleton R, Sweeney MG, Rosenbloom L, Harding AE. Mitochondrial DNA 8993 (NARP) mutation presenting with a heterogeneous phenotype including 'cerebral palsy'. *Arch Dis Child* 1994;**71**:419–422.
- Gaemers IC, Van Pelt AM, Themmen AP, De Rooij DG. Isolation and characterization of all-trans-retinoic acid-responsive genes in the rat testis. *Mol Reprod Dev* 1998;**50**:1–6.
- Garrido N, Griparic L, Jakitalo E, Wartiovaara J, van der Blik AM, Spelbrink JN. Composition and dynamics of human mitochondrial nucleoids. *Mol Biol Cell* 2002;**14**:1583–1596.
- Gaspari M, Falkenberg M, Larsson NG, Gustafsson CM. The mitochondrial RNA polymerase contributes critically to promoter specificity in mammalian cells. *EMBO J* 2004;**23**:4606–4614.
- Gemma C, Sookoian S, Alvarinas J, Garcia SI, Quintana L, Kanevsky D, Gonzalez CD, Pirola CJ. Maternal pregestational BMI is associated with methylation of the PPARGC1A promoter in newborns. *Obesity (Silver Spring)* 2009;**17**:1032–1039.
- Giles RE, Blanc H, Cann HM, Wallace DC. Maternal inheritance of human mitochondrial DNA. *Proc Natl Acad Sci USA* 1980;**77**:6715–6719.
- Goto Y, Nonaka I, Horai S. A mutation in the tRNA(Leu) (UUR) gene associated with the MELAS subgroup of mitochondrial encephalomyopathies. *Nature* 1990;**348**:651–653.
- Grazieswicz MA, Longley MJ, Copeland WC. DNA polymerase  $\gamma$  in mitochondrial DNA replication and repair. *Chem Rev* 2005;**106**:383–405.
- Gyllenstein U, Wharton D, Josefsson A, Wilson AC. Paternal inheritance of mitochondrial DNA in mice. *Nature* 1991;**352**:255–257.
- Han ZM, Chen DY, Li JS, Sun QY, Wan QH, Kou ZH, Rao G, Lei L, Liu ZH, Fang SG. Mitochondrial DNA heteroplasmy in calves cloned by using adult somatic cell. *Mol Reprod Dev* 2004;**67**:207–214.
- Han Z, Vassena R, Chi MM, Potireddy S, Sutovsky M, Moley KH, Sutovsky P, Latham KE. Role of glucose in cloned mouse embryo development. *Am J Physiol Endocrinol Metab* 2008;**295**:E798–E809.
- Hance N, Ekstrand MI, Trifunovic A. Mitochondrial DNA polymerase gamma is essential for mammalian embryogenesis. *Hum Mol Genet* 2005;**14**:1775–1783.
- Hauswirth WW, Laipis PJ. Mitochondrial DNA polymorphism in a maternal lineage of Holstein cows. *Proc Natl Acad Sci USA* 1982;**79**:4686–4690.
- He Z, Liu HC, Rosenwaks Z. Cryopreservation of nuclear material as a potential method of fertility preservation. *Fertil Steril* 2003;**79**:347–354.
- He J, Mao CC, Reyes A, Sembongi H, Di Re M, Granycome C, Clippingdale AB, Fearnley IM, Harbour M, Robinson AJ *et al.* The AAA+ protein ATAD3 has displacement loop binding properties and is involved in mitochondrial nucleoid organization. *J Cell Biol* 2007;**176**:141–146.
- Hecht NB, Liem H, Kleene KC, Distel RJ, Ho SM. Maternal inheritance of the mouse mitochondrial genome is not mediated by a loss or gross alteration of the paternal mitochondrial DNA or by methylation of the oocyte mitochondrial DNA. *Dev Biol* 1984;**102**:452–461.
- Hiendleder S, Zakhartchenko V, Wenigerkind H, Reichenbach HD, Bruggerhoff K, Prella K, Brem G, Stojkovic M, Wolf E. Heteroplasmy in bovine fetuses produced by intra- and inter-subspecific somatic cell nuclear transfer: neutral segregation of nuclear donor mitochondrial DNA in various tissues and evidence for recipient cow mitochondria in fetal blood. *Biol Reprod* 2003;**68**:159–166.
- Holt IJ, Jacobs HT. Response: the mitochondrial DNA replication bubble has not burst. *Trends Biochem Sci* 2003;**28**:355–356.
- Houghton FD. Energy metabolism of the inner cell mass and trophectoderm of the mouse blastocyst. *Differentiation* 2006;**74**:11–18.
- Howell N, Bindoff LA, McCullough DA, Kubacka I, Poulton J, Mack D, Taylor L, Turnbull DM. Leber hereditary optic neuropathy: identification of the same mitochondrial NDI mutation in six pedigrees. *Am J Hum Genet* 1991;**49**:939–950.
- Hua S, Zhang Y, Li XC, Ma LB, Cao JW, Dai JP, Li R. Effects of granulosa cell mitochondria transfer on the early development of bovine embryos in vitro. *Cloning Stem Cells* 2007;**9**:237–246.
- Hua S, Zhang Y, Song K, Song J, Zhang Z, Zhang L, Zhang C, Cao J, Ma L. Development of bovine-ovine interspecies cloned embryos and mitochondria segregation in blastomeres during preimplantation. *Anim Reprod Sci* 2008;**105**:245–257.
- Ikumi S, Sawai K, Takeuchi Y, Iwayama H, Ishikawa H, Ohsumi S, Fukui Y. Interspecies somatic cell nuclear transfer for in vitro production of Antarctic minke whale (*Balaenoptera bonaerensis*) embryos. *Cloning Stem Cells* 2004;**6**:284–293.
- Illmensee K, Levanduski M, Zavos PM. Evaluation of the embryonic preimplantation potential of human adult somatic cells via an embryo interspecies bioassay using bovine oocytes. *Fertil Steril* 2006;**85**:1248–1260.
- Inoue K, Ogonuki N, Yamamoto Y, Takano K, Miki H, Mochida K, Ogura A. Tissue-specific distribution of donor mitochondrial DNA in cloned mice produced by somatic cell nuclear transfer. *Genesis* 2004;**39**:79–83.
- Jansen RP, de Boer K. The bottleneck: mitochondrial imperatives in oogenesis and ovarian follicular fate. *Mol Cell Endocrinol* 1998;**145**:81–88.
- Jenuth JP, Peterson AC, Fu K, Shoubridge EA. Random genetic drift in the female germline explains the rapid segregation of mammalian mitochondrial DNA. *Nat Genet* 1996;**14**:146–151.
- Jiang Y, Liu SZ, Zhang YL, Jiang MX, Sun QY, Chen DY. The fate of mitochondria in ibex-hirux reconstructed early embryos. *Acta Biochim Biophys Sin (Shanghai)* 2004;**36**:371–374.
- Jiang Y, Chen T, Nan CL, Ouyang YC, Sun QY, Chen DY. In vitro culture and mtDNA fate of ibex-rabbit nuclear transfer embryos. *Zygote* 2005;**13**:233–240.
- Jiang Y, Chen T, Wang K, Jiang MX, Liu SZ, Ouyang YC, Sun QY, Chen DY. Different fates of donor mitochondrial DNA in

- bovine-rabbit and cloned bovine-rabbit reconstructed embryos during preimplantation development. *Front Biosci* 2006;**11**:1425–1432.
- Kaneda H, Hayashi J, Takahama S, Taya C, Lindahl KF, Yonekawa H. Elimination of paternal mitochondrial DNA in intraspecific crosses during early mouse embryogenesis. *Proc Natl Acad Sci USA* 1995;**92**:4542–4546.
- Kaufman BA, Durisic N, Mativetsky JM, Costantino S, Hancock MA, Grutter P, Shoubridge EA. The mitochondrial transcription factor TFAM coordinates the assembly of multiple DNA molecules into nucleoid-like structures. *Mol Biol Cell* 2007;**18**:3225–3236.
- Kawamura T, Ono K, Moimoto T, Wada H, Hirai M, Hidaka K, Morisaki T, Heike T, Nakahata T, Kita T et al. Acetylation of GATA-4 is involved in the differentiation of embryonic stem cells into cardiac myocytes. *J Biol Chem* 2005;**280**:19682–19688.
- Kenchington EL, Hamilton L, Cogswell A, Zouros E. Paternal mtDNA and maleness are co-inherited but not causally linked in mytilid mussels. *PLoS One* 2009;**4**:e6976.
- King MP, Attardi G. Human cells lacking mtDNA: repopulation with exogenous mitochondria by complementation. *Science* 1989;**246**:500–503.
- Kondo R, Matsuura ET, Chigusa SI. Further observation of paternal transmission of *Drosophila* mitochondrial DNA by PCR selective amplification method. *Genet Res* 1992;**59**:81–84.
- Kondoh H, Leonart ME, Nakashima Y, Yokode M, Tanaka M, Bernard D, Gil J, Beach D. A high glycolytic flux supports the proliferative potential of murine embryonic stem cells. *Antioxid Redox Signal* 2007;**9**:293–299.
- Korhonen JA, Gaspari M, Falkenberg M. TWINKLE Has 5' → 3' DNA helicase activity and is specifically stimulated by mitochondrial single-stranded DNA-binding protein. *J Biol Chem* 2003;**278**:48627–48632.
- Krachtsberg Y, Schwartz M, Brown TA, Ebralidse K, Kunz WS, Clayton DA, Vissing J, Khrapko K. Recombination of human mitochondrial DNA. *Science* 2004;**304**:981.
- Kucej M, Butow RA. Evolutionary tinkering with mitochondrial nucleoids. *Trends Cell Biol* 2007;**17**:586–592.
- Laipis PJ. Construction of heteroplasmic mice containing two mitochondrial DNA genotypes by micromanipulation of single-cell embryos. *Methods Enzymol* 1996;**264**:345–357.
- Lanza RP, Cibelli JB, Diaz F, Moraes CT, Farin PW, Farin CE, Hammer CJ, West MD, Damiani P. Cloning of an endangered species (*Bos gaurus*) using interspecies nuclear transfer. *Cloning* 2000;**2**:79–90.
- Larsson NG, Garman JD, Oldfors A, Barsh GS, Clayton DA. A single mouse gene encodes the mitochondrial transcription factor A and a testis-specific nuclear HMG-box protein. *Nat Genet* 1996;**13**:296–302.
- Larsson NG, Oldfors A, Garman JD, Barsh GS, Clayton DA. Down-regulation of mitochondrial transcription factor A during spermatogenesis in humans. *Hum Mol Genet* 1997;**6**:185–191.
- Larsson NG, Wang J, Wilhelmsson H, Oldfors A, Rustin P, Lewandoski M, Barsh GS, Clayton DA. Mitochondrial transcription factor A is necessary for mtDNA maintenance and embryogenesis in mice. *Nat Genet* 1998;**18**:231–236.
- Leahy A, Xiong JW, Kuhnert F, Stuhlmann H. Use of developmental marker genes to define temporal and spatial patterns of differentiation during embryoid body formation. *J Exp Zool* 1999;**284**:67–81.
- Leclercq N, Van Der Bruggen P, Foury F. Mitochondrial DNA polymerases from yeast to man: a new family of polymerases. *Gene* 1997;**185**:147–152.
- Leese HJ. Metabolic control during preimplantation mammalian development. *Hum Reprod Update* 1995;**1**:63–72.
- Leese HJ, Barton AM. Pyruvate and glucose uptake by mouse ova and preimplantation embryos. *J Reprod Fertil* 1984;**72**:9–13.
- Legros F, Malka F, Frachon P, Lombes A, Rojo M. Organization and dynamics of human mitochondrial DNA. *J Cell Sci* 2004;**117**:2653–2662.
- Li G, Liu Y, Tsang SS. Expression of a retinoic acid-inducible mitochondrial ND5 gene is regulated by cell density in bovine papillomavirus DNA-transformed mouse C127 cells but not in revertant cells. *Int J Oncol* 1994;**5**:301–307.
- Li L, Tang H, Mullen TM, Westberg C, Reddy TR, Rose DW, Wong-Staal F. A role for RNA helicase A in post-transcriptional regulation of HIV type 1. *Proc Nat Acad Sci USA* 1999;**96**:709–714.
- Li Y, Dai Y, Du W, Zhao C, Wang H, Wang L, Li R, Liu Y, Wan R, Li N. Cloned endangered species takin (*Budorcas taxicolor*) by inter-species nuclear transfer and comparison of the blastocyst development with yak (*Bos grunniens*) and bovine. *Mol Reprod Dev* 2006;**73**:189–195.
- Liu H, Chang HC, Zhang J, Grifo J, Krey LC. Metaphase II nuclei generated by germinal vesicle transfer in mouse oocytes support embryonic development to term. *Hum Reprod* 2003;**18**:1903–1907.
- Lloyd RE, Lee J-H, Alberio R, Bowles EJ, Ramalho-Santos J, Campbell KH, St John JC. Aberrant nucleocytoplasmic cross-talk results in donor cell mtDNA persistence in cloned embryos. *Genetics* 2006;**172**:2515–2527.
- Loi P, Ptak G, Dattena M, Ledda S, Naitana S, Cappai P. Embryo transfer and related technologies in sheep reproduction. *Reprod Nutr Dev* 1998;**38**:615–628.
- Ma J, Svoboda P, Schultz RM, Stein P. Regulation of zygotic gene activation in the preimplantation mouse embryo: global activation and repression of gene expression. *Biol Reprod* 2001;**64**:1713–1721.
- Ma LB, Yang L, Hua S, Cao JW, Li JX, Zhang Y. Development in vitro and mitochondrial fate of interspecies cloned embryos. *Reprod Domest Anim* 2008a;**43**:279–285.
- Ma LB, Yang L, Zhang Y, Cao JW, Hua S, Li JX. Quantitative analysis of mitochondrial RNA in goat-sheep cloned embryos. *Mol Reprod Dev* 2008b;**75**:33–39.
- Majamma K, Moilanen JS, Uimonen S, Remes AM, Salmela PI, Karppa M, Majamma-Voltti KA, Rusanen H, Sorri M, Peuhkurined KJ et al. Epidemiology of A3243G, the mutation for mitochondrial encephalomyopathy, lactic acidosis, and stroke-like episodes: prevalence of the mutation in adult population. *Am J Hum Genet* 1998;**63**:447–454.
- Marchington DR, Scott Brown MS, Lamb VK, van Golde RJ, Kremer JA, Tuerlings JH, Mariman EC, Balen AH, Poulton J. No evidence for paternal mtDNA transmission to offspring or extra-embryonic tissues after ICSI. *Mol Hum Reprod* 2002;**8**:1046–1049.
- May-Panloup P, Chretien MF, Savagner F, Vasseur C, Jean M, Malthiery Y, Reynier P. Increased sperm mitochondrial DNA content in male infertility. *Hum Reprod* 2003;**18**:550–556.
- May-Panloup P, Vignon X, Chretien MF, Heymen Y, Tamassia M, Malthiery Y, Reynier P. Increase of mitochondrial DNA content and transcripts in early bovine embryogenesis associated with upregulation of mtTFA and NRF1 transcription factors. *Reprod Biol Endocrinol* 2005;**3**:65.
- McConnell JM, Petrie L. Mitochondrial DNA turnover occurs during preimplantation development and can be modulated by environment factors. *Reprod Biomed Online* 2004;**9**:418–424.
- McFarland R, Taylor RW, Turnbull DM. Mitochondrial disease—its impact, etiology, and pathology. *Curr Top Dev Biol* 2007;**77**:113–155.
- McKenzie M, Trounce I. Expression of *Rattus norvegicus* mtDNA in *Mus musculus* cells results in multiple respiratory chain defects. *J Biol Chem* 2000;**275**:31514–31519.
- McKinney-Freeman S, Daley G. Derivation of hematopoietic stem cells from murine embryonic stem cells. *J Vis Exp* 2007;**25**:162.
- Meirelles FV, Smith LC. Mitochondrial genotype segregation in a mouse heteroplasmic lineage produced by embryonic karyoplast transplantation. *Genetics* 1997;**145**:445–451.

- Meirelles FV, Smith LC. Mitochondrial genotype segregation during preimplantation development in mouse heteroplasmic embryos. *Genetics* 1998;**148**:877–883.
- Meirelles FV, Bordignon V, Watanabe Y, Watanabe M, Dayan A, Lobo RB, Garcia JM, Smith LC. Complete replacement of the mitochondrial genotype in a *Bos indicus* calf reconstructed by nuclear transfer to a *Bos taurus* oocyte. *Genetics* 2001;**158**:351–356.
- Minai L, Martinovic J, Chretien D, Dumez F, Razavi F, Munnich A, Rotig A. Mitochondrial respiratory chain complex assembly and function during human fetal development. *Mol Genet Metab* 2008;**94**:120–126.
- Moyes CD, Battersby BJ, Leary SC. Regulation of muscle mitochondrial design. *J Exp Biol* 1998;**201**:299–307.
- Nakada K, Inoue K, Ono T, Isobe K, Ogura A, Goto YI, Nonaka I, Hayashi JI. Inter-mitochondrial complementation: mitochondria-specific system preventing mice from expression of disease phenotypes by mutant mtDNA. *Nat Med* 2001;**7**:934–940.
- Niwa H, Toyookay Y, Shimosato D, Strumpf D, Takahashi K, Yagi R, Rossant J. Interaction between Oct3/4 and Cdx2 determines trophoblast differentiation. *Cell* 2005;**123**:917–929.
- Oakes CC, La Salle S, Smiraglia DJ, Robaire B, Trasler JM. Developmental acquisition of genome-wide DNA methylation occurs prior to meiosis in male germ cells. *Dev Biol* 2007;**307**:368–379.
- Oh HJ, Kim MK, Jang G, Kim HJ, Hong SG, Park JE, Park K, Park C, Sohn SH, Kim DY et al. Cloning endangered gray wolves (*Canis lupus*) from somatic cells collected postmortem. *Theriogenology* 2008;**70**:638–647.
- Ojala D, Montoya J, Attardi G. tRNA punctuation model of RNA processing in human mitochondria. *Nature* 1981;**290**:470–474.
- Palermo GD, Colombero LT, Hariprasad JJ, Schlegel PN, Rosenwaks Z. Chromosome analysis of epididymal testicular sperm in azoospermic patients undergoing ICSI. *Hum Reprod* 2002;**17**:570–575.
- Parisi MA, Clayton DA. Similarity of human mitochondrial transcription factor I to high mobility group proteins. *Science* 1991;**252**:965–969.
- Piko L, Matsumoto L. Number of mitochondria and some properties of mitochondrial DNA in the mouse egg. *Dev Biol* 1976;**49**:1–10.
- Piko L, Taylor KD. Amounts of mitochondrial DNA and abundance of some mitochondrial gene transcripts in early mouse embryos. *Dev Biol* 1987;**123**:364–374.
- Pohjoismaki JL, Wanrooij S, Hyvarinen AK, Goffart S, Holt IJ, Spelbrink JN, Jacobs HT. Alterations to the expression level of mitochondrial transcription factor A, TFAM, modify the mode of mitochondrial DNA replication in cultured human cells. *Nucleic Acids Res* 2006;**34**:5815–5828.
- Pollack Y, Kasir J, Shemer R, Metzger S, Szyf M. Methylation pattern of mouse mitochondrial DNA. *Nucleic Acid Res* 1984;**12**:4811–4824.
- Poulten J, Kennedy S, Oakeshott P, Wells D. Preventing transmission of maternally inherited mitochondrial DNA diseases. *BMJ* 2009;**338**:b94; doi:10.1136/bmj.b94.
- Reubinoff BE, Itsykson P, Turetsky T, Pera MF, Reinhartz E, Itzik A, Ben-Hur T. Neural progenitors from human embryonic stem cells. *Nat Biotechnol* 2001;**19**:1134–1140.
- Reynier P, May-Panloup P, Chretien MF, Morgan CJ, Jean M, Savagner F, Barriere P, Malthiery Y. Mitochondrial DNA content affects the fertilizability of human oocytes. *Mol Hum Reprod* 2001;**7**:425–429.
- Rivolta MN, Holley CM. Asymmetric segregation of mitochondria and mortalin correlates with the multi-lineage potential of inner ear sensory cell progenitors in vitro. *Brain Res Dev Brain Res* 2002;**133**:49–56.
- Roberti M, Bruni F, Polosa PL, Gadaleta MN, Cantatore P. The Drosophila termination factor DmTTF regulates in vivo mitochondrial transcription. *Nucleic Acids Res* 2006;**34**:2109–2116.
- Rohwedel J, Guan K, Wobus AM. Induction of cellular differentiation by retinoic acid in vitro. *Cells Tissues Organs* 1999;**165**:190–202.
- Sacconi S, Salviati L, Nishgaki Y, Walker WF, Hernandez-Rosa E, Trevisson E, Delplace S, Desnuelle C, Shanske S, Hirano M et al. A functionally dominant mitochondrial DNA mutation. *Hum Mol Genet* 2008;**17**:1814–1820.
- Sansinena MJ, Hylan D, Hebert K, Denniston RS, Godke RA. Banteng (*Bos javanicus*) embryos and pregnancies produced by interspecies nuclear transfer. *Theriogenology* 2005;**63**:1081–1091.
- Sathananthan H, Pera M, Trounson A. The fine structure of human embryonic stem cells. *Reprod Biomed Online* 2002;**4**:56–61.
- Sato A, Kono T, Nakada K, Ishikawa K, Inoue S, Yonekawa H, Hayashi J. Gene therapy for progeny of mito-mice carrying pathogenic mtDNA by nuclear transplantation. *Proc Natl Acad Sci USA* 2005;**102**:16765–16770.
- Satoh M, Kuroiwa T. Organization of multiple nucleoids and DNA molecules in mitochondria of a human cell. *Exp Cell Res* 1991;**196**:137–140.
- Satoh M, Kuroiwa T. The organization of multiple nucleoids and DNA molecules in mitochondria of a human cell. *Exp Cell Res* 2004;**96**:137–140.
- Schaefer AM, Blakely EL, He L, Whittaker RG, Taylor RW, Chinnery PF, Turnbull DM. Prevalence of mitochondrial DNA disease in adults. *Ann Neurol* 2008;**63**:35–39.
- Schon EA, Rizzuto R, Moraes CT, Nakase H, Zeviani M, DiMauro S. A direct repeat is a hotspot for large-scale deletion of human mitochondrial DNA. *Science* 1989;**244**:346–349.
- Schwartz M, Vissing J. Paternal inheritance of mitochondrial DNA. *N Engl J Med* 2002;**347**:576–580.
- Seow F, Sato S, Janssen CS, Riehle MO, Mukhopadhyay A, Phillips RS, Wilson RJM, Barrett MP. The plastidic DNA replication enzyme complex of *Plasmodium falciparum*. *Mol Biochem Parasitol* 2005;**141**:145–153.
- Shadel GS, Clayton DA. Mitochondrial DNA maintenance in vertebrates. *Annu Rev Biochem* 1997;**66**:409–435.
- Shitara H, Kaneda H, Sato A, Inoue K, Ogura A, Yonekawa H, Hayashi JI. Selective and continuous elimination of mitochondria microinjected into mouse eggs from spermatids, but not from liver cells, occurs throughout embryogenesis. *Genetics* 2000;**156**:1277–1284.
- Shoubridge EA, Wai T. Mitochondrial DNA and the mammalian oocyte. *Curr Top Dev Biol* 2007;**77**:87–111.
- Shutt TE, Gray MW. Twinkle, the mitochondrial replicative DNA helicase, is widespread in the eukaryotic radiation and may also be the mitochondrial DNA primase in most eukaryotes. *J Mol Evol* 2006;**62**:588–599.
- Smith LC, Alcivar AA. Cytoplasmic inheritance and its effects on development and performance. *J Reprod Fertil Suppl* 1993;**48**:31–43.
- Spelbrink JN, Toivonen JM, Hakkaart GA, Kurkela JM, Cooper HM, Lehtinen SK, Lecrenier N, Back JW, Spijer D, Foury F et al. In vivo functional analysis of the human mitochondrial DNA polymerase POLG expressed in cultured human cells. *J Biol Chem* 2000;**275**:24818–24828.
- Spelbrink JN, Li FY, Tiranti V, Nikali K, Yann QP, Tariq M, Wanrooij S, Garrido N, Comi G, Morandi L et al. Human mitochondrial DNA deletions associated with mutations in the gene encoding Twinkle, a phage T7 gene 4-like protein localized in mitochondria. *Nat Genet* 2001;**28**:223–231.
- Spikings EC. Mitochondrial DNA replication in preimplantation embryonic development. *PhD Thesis*. University of Birmingham, UK, 2007, 191.
- Spikings EC, Alderson J, St John JC. Regulated mitochondrial DNA replication during oocyte maturation is essential for successful porcine embryonic development. *Biol Reprod* 2007;**76**:327–335.

- Squirrel JM, Schramm RD, Paprocki AM, Wokosin DL, Bavister BD. Imaging mitochondrial organization in living primate oocytes and embryos using multiphoton microscopy. *Microsc Microanal* 2003; **9**:190–201.
- St John JC, Schatten G. Paternal mitochondrial DNA transmission during nonhuman primate nuclear transfer. *Genetics* 2004; **167**:897–905.
- St John J, Sakkas D, Dimitriadi K, Barnes A, Maclin V, Ramey J, Barratt C, De Jonge C. Failure of elimination of paternal mitochondrial DNA in abnormal embryos. *Lancet* 2000; **355**:200.
- St John JC, Lloyd RE, Bowles EJ, Thomas EC, El Shoubagy S. The consequences of nuclear transfer for mammalian foetal development and offspring survival. A mitochondrial DNA perspective. *Reproduction* 2004; **127**:631–641.
- St John JC, Moffatt O, D'Souza N. Aberrant heteroplasmic transmission of mtDNA in cloned pigs arising from double nuclear transfer. *Mol Reprod Dev* 2005a; **72**:450–460.
- St John JC, Ramalho-Santos J, Gray HL, Petrosko P, Rawe VY, Navara CS, Simerly CR, Schatten GP. The expression of mitochondrial DNA transcription factors during early cardiomyocyte in vitro differentiation from human embryonic stem cells. *Cloning Stem Cells* 2005b; **7**:141–153.
- Steinborn R, Zakhartchenko V, Jelyazkov J, Klein D, Wolf E, Muller M, Brem G. Composition of parental mitochondrial DNA in cloned bovine embryos. *FEBS Lett* 1998; **426**:352–356.
- Steinborn R, Schinogl P, Zakhartchenko V, Achmann R, Scherthner W, Stojkovic M, Wolf E, Muller M, Brem G. Mitochondrial DNA heteroplasmy in cloned cattle produced by fetal and adult cell cloning. *Nat Genet* 2000; **25**:255–257.
- Steinborn R, Schinogl P, Wells DN, Bergthaler A, Muller M, Brem G. Coexistence of *Bos Taurus* and *B. indicus* mitochondrial DNAs in nuclear transfer-derived somatic cattle clones. *Genetics* 2002; **162**:823–829.
- Stern S, Biggers JD, Anderson E. Mitochondria and early development of the mouse. *J Exp Zool* 1971; **176**:179–191.
- Stewart JB, Freyer C, Elson JL, Wredenberg A, Cansu Z, Trifunovic A, Larsson NG. Strong purifying selection in transmission of mammalian mitochondrial DNA PLoS. *Biology* 2008; **6**:e10.
- Steuerwald N, Barritt JA, Adler R, Malter H, Schimmel T, Chohen J, Brenner CA. Quantification of mtDNA in single oocytes, polar bodies and subcellular components by real-time rapid cycle fluorescence monitored PCR. *Zygote* 2000; **8**:209–215.
- Stojkovic M, Machado SA, Stojkovic P, Zakhartchenko V, Hutzler P, Gonçalves PB, Wolf E. Mitochondrial distribution and adenosine triphosphate content of bovine oocytes before and after in vitro maturation: correlation with morphological criteria and developmental capacity after in vitro fertilization and culture. *Biol Reprod* 2001; **64**:904–909.
- Strübing C, Ahnert-Hilger G, Shan J, Wiedenmann B, Hescheler J, Wobus AM. Differentiation of pluripotent embryonic stem cells into the neuronal lineage in vitro gives rise to mature inhibitory and excitatory neurons. *Mech Dev* 1995; **53**:275–287.
- Sumer H, Jones KL, Liu J, Rollo BN, van Boxtel AL, Pralong D, Verma PJ. Transcriptional changes in somatic cells recovered from ES-somatic heterokaryons. *Stem Cells Dev* 2009; **18**:1361–1368.
- Sun YH, Chen SP, Wang YP, Hu W, Zhu ZY. Cytoplasmic impact on cross-genus cloned fish derived from transgenic common carp (*Cyprinus carpio*) nuclei and goldfish (*Carassius auratus*) enucleated eggs. *Biol Reprod* 2005; **72**:510–515.
- Surani MA, Hayashi K, Hajkova P. Genetic and epigenetic regulators of pluripotency. *Cell* 2007; **126**:663–676.
- Sutovsky P, Schatten G. Paternal contributions to the mammalian zygote: fertilization after sperm-egg fusion. *Int Rev Cytol* 2000; **195**:1–65.
- Sutovsky P, Moreno RD, Ramalho-Santos J, Dominko T, Simerly C, Schatten G. Ubiquitin tag for sperm mitochondria. *Nature* 1999; **402**:371–372.
- Sutovsky P, Van Leyen K, McCauley T, Day BN, Sutovsky M. Degradation of paternal mitochondria after fertilization: implications for heteroplasmy, assisted reproductive technologies and mtDNA inheritance. *Reprod Biomed Online* 2004; **8**:24–33.
- Tachibana M, Sparman M, Sritanandomchai H, Ma H, Clepper L, Woodward J, Li Y, Ramsey C, Kolotushkina O, Mitalipov S. Mitochondrial gene replacement in primate offspring and embryonic stem cells. *Nature* 2009; **461**:367–372.
- Takahashi K, Yamanaka S. Induction of pluripotent stem cells from mouse embryonic and adult fibroblast cultures by defined factors. *Cell* 2006; **126**:663–676.
- Takamatsu C, Umeda S, Ohsato T, Ohno T, Abe Y, Fukuoh A, Shinagawa H, Hamasaki N, Kang D. Regulation of mitochondrial D-loops by transcription factor A and singlestranded DNA-binding protein. *EMBO Rep* 2002; **3**:451–456.
- Takeda K, Takahashi S, Onishi A, Goto Y, Miyazawa A, Imai H. Dominant distribution of mitochondrial DNA from recipient oocytes in bovine embryos and offspring after nuclear transfer. *J Reprod Fertil* 1999; **116**:253–259.
- Takeda K, Akagi S, Kaneyama K, Kojima T, Takahashi S, Imai H, Yamanaka M, Onishi A, Hanada H. Proliferation of donor mitochondrial DNA in nuclear transfer calves (*Bos Taurus*) derived from cumulus cells. *Mol Reprod Dev* 2003; **64**:429–437.
- Takeda K, Tasai M, Iwamoto M, Onishi A, Tagami T, Nirasawa K, Hanada H, Pinkert CA. Microinjection of cytoplasm or mitochondria derived from somatic cells affects parthenogenetic development of murine oocytes. *Biol Reprod* 2005; **72**:1397–1404.
- Takeda K, Tasai M, Iwamoto M, Akita T, Tagami T, Nirasawa K, Hanada H, Onishi A. Transmission of mitochondrial DNA in pigs and progeny derived from nuclear transfer of Meishan pig fibroblast cells. *Mol Reprod Dev* 2006; **73**:306–312.
- Tamassia M, Nuttinck F, May-Panloup P, Reynier P, Heyman Y, Charpigny G, Stojkovic M, Hiendlender S, Renard JP, Chastant-Maillard S. In vitro embryo production efficiency in cattle and its association with oocyte adenosine triphosphate content, quantity or mitochondrial DNA, and mitochondrial DNA haplogroup. *Biol Reprod* 2004; **71**:697–704.
- Tao Y, Cheng L, Zhang M, Li B, Ding J, Zhang Y, Fang F, Zhang X, Maddox-Hyttel P. Ultrastructural changes in goat interspecies and intraspecies reconstructed early embryos. *Zygote* 2008; **16**:93–110.
- Taylor RW, McDonnell MT, Blakely EL, Chinnery PF, Taylor GA, Howell N, Zeviani M, Briem E, Carrara F, Turnbull DM. Genotypes from patients indicate no paternal mitochondrial DNA contribution. *Ann Neurol* 2003; **54**:521–524.
- Theoret CL, Dore M, Mulon PY, Desrochers A, Viramontes F, Filion F, Smith LC. Short- and long-term skin graft survival in cattle clones with different mitochondrial haplotypes. *Theriogenology* 2006; **65**:1465–1479.
- Thongphakdee A, Kobayashi S, Imai K, Inaba Y, Tasai M, Tagami T, Nirasawa K, Nagai T, Saito N, Techakumphu M et al. Interspecies nuclear transfer embryos reconstructed from cat somatic cells and bovine ooplasm. *J Reprod Dev* 2008; **54**:142–147.
- Thundathil J, Filion F, Smith LC. Molecular control of mitochondrial function in preimplantation mouse embryos. *Mol Reprod Dev* 2005; **71**:405–413.
- Tomaska L, Makhov AM, Nosek J, Kucejova B, Griffith JD. Electron microscopic analysis supports a dual role for the mitochondrial telomere-binding protein of *Candida parapsilosis*. *J Mol Biol* 2001; **305**:61–69.

- Trimarchi JR, Liu L, Porterfield DM, Smith PJ, Keefe DL. Oxidative phosphorylation-dependent and -independent oxygen consumption by individual preimplantation mouse embryos. *Biol Reprod* 2000; **62**:1866–1874.
- Van Blerkom J. Mitochondria in human oogenesis and preimplantation embryogenesis: engines of metabolism, ionic regulation and developmental competence. *Reproduction* 2004; **128**:269–280.
- Van Blerkom J, Davis P, Mathwig V, Alexander S. Domains of high-polarized and low-polarized mitochondria may occur in mouse and human oocytes and early embryos. *Hum Reprod* 2002; **17**:393–406.
- Van den Ouweland JM, Lemkes HH, Ruitenbeek W, Sandkuijl LA, de Vijlder MF, Struyvenberg PA, van den Kamp JJ, Maassen JA. Mutation in mitochondrial tRNA(Leu)(UUR) gene in a large pedigree with maternally transmitted type II diabetes mellitus and deafness. *Nat Genet* 1992; **1**:368–371.
- Wai T, Teoli D, Shoubridge EA. The mitochondrial DNA genetic bottleneck results from replication of a subpopulation of genomes. *Nat Genet* 2008; **40**:1484–1488.
- Wallace DC. Mitochondrial diseases in man and mouse. *Science* 1999; **283**:1482–1488.
- Wallace DC, Singh G, Lott MT, Hodge JA, Schurr TG, Lezza AM, Elsas LJ 2, Nikoskelainen EK. Mitochondrial DNA mutation associated with Leber's hereditary optic neuropathy. *Science* 1988; **242**:1427–1430.
- Wang Y, Bogenhagen DF. Human mitochondrial DNA nucleoids are linked to protein folding machinery and metabolic enzymes at the mitochondrial inner membrane. *J Biol Chem* 2006; **281**:25791–25802.
- Wernette CM, Kaguni LS. A mitochondrial DNA polymerase from embryos of *Drosophila melanogaster*. Purification, subunit structure, and partial characterization. *J Biol Chem* 1986; **261**:14764–14770.
- Wilding M, Dale B, Marino M, di Matteo L, Alviggi C, Pisaturo ML, Lombardi L, De Placido G. Mitochondrial aggregation patterns and activity in human oocytes and preimplantation embryos. *Hum Reprod* 2001; **16**:909–917.
- Xiong C, Tang DQ, Xie CQ, Zhang L, Xu KF, Thompson WE, Chou W, Gibbons GH, Chang LJ, Yang LJ et al. Genetic engineering of human embryonic stem cells with lentiviral vectors. *Stem Cells Dev* 2005; **14**:367–377.
- Yang CX, Han ZM, Wen DC, Sun QY, Zhang KY, Zhang LS, Wu YQ, Kou ZH, Chen DY. In vitro development and mitochondrial fate of macaca-rabbit cloned embryos. *Mol Reprod Dev* 2003; **65**:396–401.
- Yang CX, Kou ZH, Wang K, Jiang Y, Mao WW, Sun QY, Sheng HZ, Chen DY. Quantitative analysis of mitochondrial DNAs in macaque embryos reprogrammed by rabbit oocytes. *Reproduction* 2004; **127**:201–205.
- Yasukawa T, Yang MY, Jacobs HT, Holt IJ. A bidirectional origin of replication maps to the major noncoding region of human mitochondrial DNA. *Mol Cell* 2005; **18**:651–662.
- Yasukawa T, Reyes A, Cluett TJ, Yang MY, Bowmaker M, Jacobs HT, Holt IJ. Replication of vertebrate mitochondrial DNA entails transient ribonucleotide incorporation throughout the lagging strand. *EMBO J* 2006; **25**:5358–5371.
- Ye F, Carrodeguas JA, Bogenhagen DF. The gamma subfamily of DNA polymerases: cloning of a developmentally regulated cDNA encoding *Xenopus laevis* mitochondrial DNA polymerase gamma. *Nucleic Acids Res* 1996; **24**:1481–1488.
- Zhao X, Li N, Guo W, Hu X, Liu Z, Gong G, Wang A, Feng J, Wu C. Further evidence for paternal inheritance of mitochondrial DNA in the sheep (*Ovis aries*). *Heredity* 2004; **93**:399–403.
- Zhong Z, Hao Y, Li R, Spate L, Wax D, Sun QY, Prather RS, Schatten H. Analysis of heterogeneous mitochondria distribution in somatic cell nuclear transfer porcine embryos. *Microsc Microanal* 2008; **14**:418–432.
- Zouros E, Freeman KR, Ball AO, Pogson GH. Direct evidence for extensive paternal mitochondrial DNA inheritance in the marine mussel *Mytilus*. *Nature* 1992; **359**:412–414.
